# Supplementary material for: A comparison of the solution radical propagation kinetics of partially water-miscible non-functional acrylates to acrylic acid
Source: Royal Society of Chemistry journal article supplement (doi:10.1039/d0py01356k), 2020-01-01
Supplement: d0py01356k1.pdf [file d0py01356k1.pdf]

## Supporting Information

### A COMPARISON OF THE SOLUTION RADICAL PROPAGATION KINETICS OF PARTIALLY WATER-MISCIBLE NON-FUNCTIONAL ACRYLATES TO ACRYLIC ACID

Maryam Agboluaje, Ibrahim Refai, Henry Manston, Robin A. Hutchinson\* <sup>1</sup>

Eva Dušička, Anna Urbanová, Igor Lacík\* <sup>2,3</sup>

<sup>1</sup>Department of Chemical Engineering, Dupuis Hall, Queen's University,  
Kingston, Ontario K7L 3N6, Canada; [robin.hutchinson@queensu.ca](mailto:robin.hutchinson@queensu.ca)

<sup>2</sup>Polymer Institute of the Slovak Academy of Sciences, Dúbravská cesta 9,  
845 41 Bratislava, Slovakia; [igor.lacik@savba.sk](mailto:igor.lacik@savba.sk)

<sup>3</sup>Centre for Advanced Materials Application of the Slovak Academy of Sciences, Dúbravská  
cesta 9, 845 11, Bratislava, Slovakia

Curve smoothing was performed on the 1<sup>st</sup> derivative  $\left(\frac{dw(\log M)}{d\log M}\right)$  plots calculated from the RI and LS molar mass distributions collected at Queen's University using finite differences (equation S1) to reduce the noise and unambiguously identify the location of the maxima, as shown in **Figure S1**.

$$\frac{dw(\log M)_k}{d\log M_k} = \frac{w(\log M)_k - w(\log M)_{k+j}}{\log M_k - \log M_{k+j}} \quad (\text{S1})$$

Index  $k$  represents the data slice and  $\log M_k$  and  $w(\log M)_k$  are the corresponding  $\log M$  and  $w(\log M)$  values. The value of the step size  $j$  is selected to significantly reduce the noise without losing the features of the distribution. Typically,  $j \approx 7-10$  was chosen for the distributions collected from the Waters RI detector, which provided 300-600 slices of data. The Wyatt Instruments LS detector provided  $\sim 600$  slices of data and a typical value chosen for  $j \approx 30-40$ .

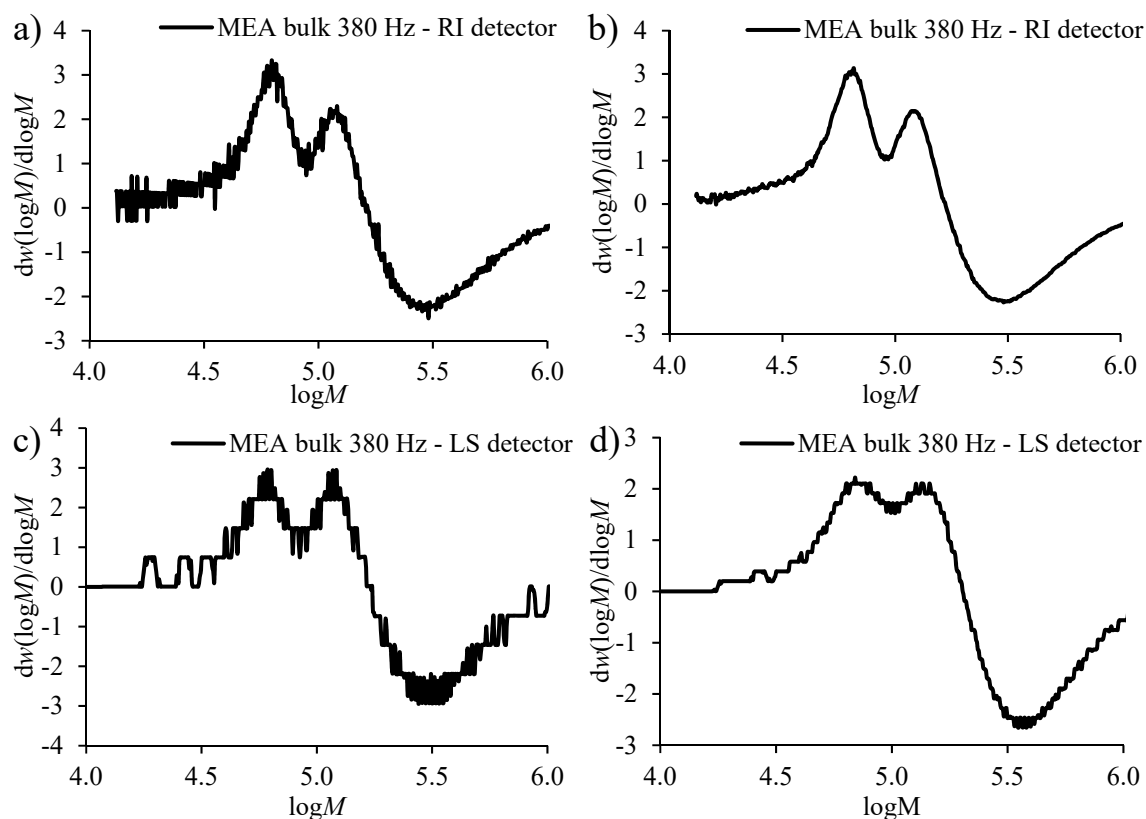

**Figure S1.** First derivative plots calculated using the MMD bulk MEA at 380 Hz (a) before and (b) after curve smoothing procedure using data from the RI detector and (c) before and (d) after curve smoothing procedure using data from the LS detector.

**Table S1. Density correlations for monomers and solvents, with  $T$  in °C. Ideal mixing of monomer and solvents was assumed for the calculation of the overall density of the solution.**

| Solvents/Monomer | $\rho$ (g·cm <sup>-3</sup> )                               | References |
|------------------|------------------------------------------------------------|------------|
| MA               | $0.9774 \cdot \exp(-0.001260T)$                            | 1          |
| MEA              | $1.0247 - 0.000835T^a$                                     | 2          |
| AA               | $1.0731 - 1.0826 \cdot 10^{-3}T - 7.2379 \cdot 10^{-7}T^2$ | 3          |
| MeOH             | $0.8110 - 0.001000T^b$                                     | 4          |
| BuOH             | $0.8398 - 0.001190T$                                       | 5          |
| EtOH             | $0.8070 - 0.000877T^c$                                     | 6          |
| H <sub>2</sub> O | $1.0087 - 0.000400T^d$                                     | 7          |
| DMF              | $1.235026 - 0.000972T$                                     | 5          |

<sup>a</sup>MEA density correlation assumes the temperature dependence is identical to butyl acrylate with the y-intercept selected such that  $\rho_{MEA} = 1.008$  g/cm<sup>3</sup> (Sigma-Aldrich) at 20 °C. <sup>b</sup>MeOH density correlation obtained from linear regression of  $\rho_{MeOH}$  data between 25-50 °C. <sup>c</sup>EtOH density correlation obtained from linear regression of  $\rho_{EtOH}$  data between 15-55 °C. <sup>d</sup>H<sub>2</sub>O density correlation obtained from linear regression based of  $\rho_{H_2O}$  data between 17-82 °C.

**Table S2. A comparison of MEA  $k_p$  values calculated from SEC analysis of PLP-generated polymer MMDs using refractive index (RI) and multiangle light scattering (LS) detectors.  $\Delta$  is the percent difference between values estimates from RI and LS detection according to  $(k_{pI} \text{ RI} - k_{pI} \text{ LS}) / (k_{pI} \text{ RI})$ . All samples generated at 30 °C using 5 mmol·L<sup>-1</sup> DMPA initiator, with  $w_{MEA}$  the weight fraction of MEA in solution and  $\alpha_{MeOH}$  the weight fraction of MeOH (balance H<sub>2</sub>O) in the solvent.**

| $w_{MEA}$                              | $f$<br>(Hz) | $\log M_1$<br>RI | $M_1/M_2$<br>RI | $k_{p1} \cdot 10^{-3}$ RI<br>(L·mol <sup>-1</sup> ·s <sup>-1</sup> ) | $\log M_1$<br>LS | $M_1/M_2$<br>LS | $k_{p1} \cdot 10^{-3}$ LS<br>(L·mol <sup>-1</sup> ·s <sup>-1</sup> ) | $\Delta$ (%) |
|----------------------------------------|-------------|------------------|-----------------|----------------------------------------------------------------------|------------------|-----------------|----------------------------------------------------------------------|--------------|
| <b>Bulk</b>                            |             |                  |                 |                                                                      |                  |                 |                                                                      |              |
| 1.00                                   | 380         | 4.847            | 0.486           | 26.7                                                                 | 4.812            | 0.452           | 24.7                                                                 | 7.74         |
| <b><math>\alpha_{MeOH}=0.70</math></b> |             |                  |                 |                                                                      |                  |                 |                                                                      |              |
| 0.83                                   | 300         | 4.879            | 0.538           | 28.4                                                                 | 4.886            | 0.546           | 28.9                                                                 | -1.62        |
| 0.83                                   | 400         | 4.776            | 0.513           | 29.9                                                                 | 4.799            | 0.470           | 31.5                                                                 | -5.44        |
| <b><math>\alpha_{MeOH}=0.44</math></b> |             |                  |                 |                                                                      |                  |                 |                                                                      |              |
| 0.82                                   | 400         | 4.816            | 0.509           | 32.7                                                                 | 4.821            | 0.513           | 33.1                                                                 | -1.16        |
| 0.14                                   | 300         | 4.529            | 0.558           | 81.2                                                                 | 4.528            | 0.561           | 81.0                                                                 | 0.23         |
| 0.14                                   | 350         | 4.463            | 0.535           | 81.3                                                                 | 4.457            | 0.528           | 80.2                                                                 | 1.37         |

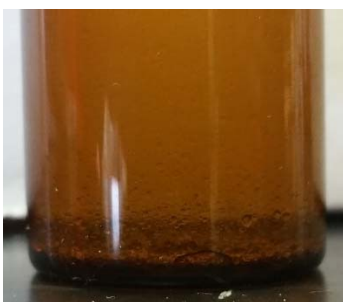

**Figure S2. Droplets observed in 26 wt% MEA at  $\alpha_{MeOH} = 0.20$  with  $6 \text{ mmol}\cdot\text{L}^{-1}$  DMPA. The MEA system became immiscible when DMPA was added to reaction mixtures with a high water content (e.g., 5 wt% MEA in water, 13 and 26 wt% MEA at  $\alpha_{MeOH} = 0.20$ ).**

**Table S3.  $k_p$  values for bulk MEA at 30 °C using DMPA as initiator.**

| $C_{Initiator}$<br>( $\text{mmol}\cdot\text{L}^{-1}$ ) | $f$<br>(Hz) | $\log M_1$<br>RI | $M_1/M_2$ | RI $k_{p1}\cdot 10^{-3}$<br>( $\text{L}\cdot\text{mol}^{-1}\cdot\text{s}^{-1}$ ) | Notes |
|--------------------------------------------------------|-------------|------------------|-----------|----------------------------------------------------------------------------------|-------|
| 5.0                                                    | 380         | 4.799            | 0.570     | 23.9                                                                             |       |
| 5.0                                                    | 480         | 4.670            | 0.494     | 22.5                                                                             |       |
| 5.0                                                    | 380         | 4.792            | 0.505     | 23.5                                                                             |       |
| 5.0                                                    | 480         | 4.680            | 0.469     | 23.0                                                                             |       |
| 5.0                                                    | 380         | 4.847            | 0.486     | 26.7                                                                             |       |
| 5.0                                                    | 480         | 4.755            | 0.442     | 27.3                                                                             |       |
| 5.0                                                    | 380         | 4.827            | 0.541     | 25.3                                                                             |       |
| 5.0                                                    | 380         | 4.813            | 0.558     | 24.5                                                                             |       |
| 5.0                                                    | 480         | 4.747            | 0.518     | 26.6                                                                             |       |
| 5.0                                                    | 480         | 4.754            | 0.540     | 27.0                                                                             |       |
| 5.0                                                    | 380         | -                | 0.563     | 22.8                                                                             | 8     |
| 5.0                                                    | 480         | -                | 0.516     | 24.5                                                                             | 8     |
| 7.0                                                    | 380         | -                | 0.502     | 23.5                                                                             | 8     |
| 7.0                                                    | 480         | -                | 0.570     | 24.5                                                                             | 8     |

**Table S4.  $k_p$  values for MEA at 30 °C determined from PLP experiments conducted in MeOH and MeOH/H<sub>2</sub>O mixtures. Experiments used DMPA as initiator unless otherwise indicated (<sup>a</sup>D1173 initiator).  $w_{MEA}$  and  $v_{MEA}$  are weight and volume fraction of monomer in solution, respectively, and  $\alpha_{MeOH}$  is the weight fraction of MeOH (balance H<sub>2</sub>O) in the solvent. Some MMDs were transformed with the parameter  $\gamma$  in order to reveal PLP structure according to a technique described in another work.<sup>9</sup> <sup>b</sup>Polymer precipitated out of PLP solution after pulsing.**

| $w_{MEA}$ | $v_{MEA}$ | $C_{Initiator}$<br>(mmol·L <sup>-1</sup> ) | $\alpha_{MeOH}$ | $f$<br>(Hz) | log $M_1$<br>RI | $M_1/M_2$ | RI $k_{p1} \cdot 10^{-3}$<br>(L·mol <sup>-1</sup> ·s <sup>-1</sup> ) | Notes |
|-----------|-----------|--------------------------------------------|-----------------|-------------|-----------------|-----------|----------------------------------------------------------------------|-------|
| 0.84      | 0.80      | 5.0                                        | 1.00            | 250         | 4.897           | 0.556     | 24.7                                                                 |       |
| 0.84      | 0.80      | 5.0                                        | 1.00            | 300         | 4.827           | 0.522     | 25.2                                                                 |       |
| 0.84      | 0.80      | 5.0                                        | 1.00            | 350         | 4.776           | 0.526     | 26.2                                                                 |       |
| 0.84      | 0.80      | 5.0                                        | 1.00            | 250         | 4.870           | 0.570     | 23.2                                                                 |       |
| 0.84      | 0.80      | 5.0                                        | 1.00            | 300         | 4.820           | 0.540     | 24.8                                                                 |       |
| 0.84      | 0.80      | 5.0                                        | 1.00            | 350         | 4.765           | 0.545     | 25.5                                                                 |       |
| 0.56      | 0.50      | 5.0                                        | 1.00            | 250         | 4.680           | 0.541     | 24.0                                                                 |       |
| 0.56      | 0.50      | 5.0                                        | 1.00            | 300         | 4.603           | 0.547     | 24.1                                                                 |       |
| 0.56      | 0.50      | 5.0                                        | 1.00            | 250         | 4.733           | 0.561     | 27.1                                                                 |       |
| 0.56      | 0.50      | 5.0                                        | 1.00            | 300         | 4.664           | 0.540     | 27.8                                                                 |       |
| 0.30      | 0.25      | 5.0                                        | 1.00            | 250         | 4.469           | 0.558     | 29.6                                                                 |       |
| 0.30      | 0.25      | 5.0                                        | 1.00            | 300         | 4.405           | 0.564     | 30.6                                                                 |       |
| 0.30      | 0.25      | 5.0                                        | 1.00            | 250         | 4.506           | 0.539     | 32.2                                                                 |       |
| 0.30      | 0.25      | 5.0                                        | 1.00            | 300         | 4.437           | 0.560     | 33.0                                                                 |       |
| 0.15      | 0.13      | 5.0                                        | 1.00            | 150         | 4.353           | 0.535     | 27.2                                                                 |       |
| 0.15      | 0.13      | 5.0                                        | 1.00            | 150         | 4.428           | 0.485     | 32.3                                                                 |       |
| 0.15      | 0.13      | 5.0                                        | 1.00            | 200         | 4.289           | 0.540     | 31.3                                                                 |       |
| 0.15      | 0.13      | 5.0                                        | 1.00            | 250         | 4.200           | 0.546     | 31.8                                                                 |       |
| 0.15      | 0.13      | 5.0                                        | 1.00            | 300         | 4.030           | 0.472     | 25.8                                                                 |       |
| 0.15      | 0.13      | 5.0                                        | 1.00            | 350         | 4.009           | 0.504     | 28.7                                                                 |       |
| 0.15      | 0.13      | 5.0                                        | 1.00            | 150         | 4.400           | 0.497     | 30.3                                                                 |       |
| 0.15      | 0.13      | 5.0                                        | 1.00            | 200         | 4.301           | 0.530     | 32.1                                                                 |       |
| 0.15      | 0.13      | 5.0                                        | 1.00            | 250         | 4.225           | 0.546     | 33.7                                                                 |       |
| 0.15      | 0.13      | 5.0                                        | 1.00            | 300         | 4.137           | 0.528     | 33.0                                                                 |       |
| 0.15      | 0.13      | 5.0                                        | 1.00            | 350         | 4.067           | 0.507     | 32.8                                                                 |       |
| 0.15      | 0.13      | 5.0                                        | 1.00            | 150         | 4.443           | 0.494     | 33.4                                                                 |       |
| 0.15      | 0.13      | 5.0                                        | 1.00            | 200         | 4.331           | 0.533     | 34.4                                                                 |       |
| 0.15      | 0.13      | 5.0                                        | 1.00            | 250         | 4.245           | 0.545     | 35.4                                                                 |       |
| 0.15      | 0.13      | 5.0                                        | 1.00            | 300         | 4.161           | 0.523     | 35.0                                                                 |       |
| 0.15      | 0.13      | 5.0                                        | 1.00            | 350         | 4.094           | 0.503     | 34.9                                                                 |       |
| 0.83      | 0.80      | 5.0                                        | 0.70            | 300         | 4.879           | 0.538     | 28.4                                                                 |       |
| 0.83      | 0.80      | 5.0                                        | 0.70            | 350         | 4.830           | 0.513     | 29.6                                                                 |       |
| 0.83      | 0.80      | 5.0                                        | 0.70            | 400         | 4.776           | 0.513     | 29.9                                                                 |       |
| 0.54      | 0.50      | 5.0                                        | 0.70            | 250         | 4.786           | 0.558     | 30.6                                                                 |       |
| 0.54      | 0.50      | 5.0                                        | 0.70            | 300         | 4.664           | 0.500     | 27.7                                                                 |       |

|      |      |     |      |                                     |       |       |      |                      |
|------|------|-----|------|-------------------------------------|-------|-------|------|----------------------|
| 0.29 | 0.25 | 5.0 | 0.70 | 250                                 | 4.569 | 0.548 | 37.1 |                      |
| 0.29 | 0.25 | 5.0 | 0.70 | 300                                 | 4.535 | 0.597 | 41.2 |                      |
| 0.29 | 0.25 | 5.0 | 0.70 | 200                                 | 4.603 | 0.434 | 32.1 | a                    |
| 0.29 | 0.25 | 5.0 | 0.70 | 250                                 | 4.553 | 0.498 | 35.8 | a                    |
| 0.29 | 0.25 | 5.0 | 0.70 | 300                                 | 4.507 | 0.541 | 38.6 | a                    |
| 0.15 | 0.13 | 5.0 | 0.70 | 250                                 | 4.407 | 0.538 | 51.2 |                      |
| 0.15 | 0.13 | 5.0 | 0.70 | 300                                 | 4.330 | 0.548 | 51.4 |                      |
| 0.15 | 0.13 | 5.0 | 0.70 | 350                                 | 4.277 | 0.545 | 53.1 |                      |
| 0.15 | 0.13 | 5.0 | 0.70 | 200                                 | 4.444 | 0.540 | 44.6 | a                    |
| 0.15 | 0.13 | 5.0 | 0.70 | 250                                 | 4.369 | 0.553 | 46.9 | a                    |
| 0.15 | 0.13 | 5.0 | 0.70 | 300                                 | 4.304 | 0.564 | 48.4 | a                    |
| 0.82 | 0.80 | 5.0 | 0.44 | 300                                 | 4.936 | 0.550 | 32.4 |                      |
| 0.82 | 0.80 | 5.0 | 0.44 | 400                                 | 4.816 | 0.509 | 32.7 |                      |
| 0.53 | 0.50 | 5.0 | 0.44 | 250                                 | 4.868 | 0.590 | 36.9 |                      |
| 0.53 | 0.50 | 5.0 | 0.44 | 300                                 | 4.803 | 0.556 | 38.1 |                      |
| 0.53 | 0.50 | 5.0 | 0.44 | 350                                 | 4.762 | 0.509 | 40.5 |                      |
| 0.27 | 0.25 | 5.0 | 0.44 | 250                                 | 4.823 | 0.527 | 66.6 |                      |
| 0.27 | 0.25 | 5.0 | 0.44 | 300                                 | 4.762 | 0.492 | 69.4 |                      |
| 0.27 | 0.25 | 5.0 | 0.44 | 350                                 | 4.722 | 0.552 | 73.8 |                      |
| 0.27 | 0.25 | 5.0 | 0.44 | 250                                 | 4.825 | 0.531 | 66.9 | a                    |
| 0.27 | 0.25 | 5.0 | 0.44 | 300                                 | 4.759 | 0.541 | 68.9 | a                    |
| 0.27 | 0.25 | 5.0 | 0.44 | 350                                 | 4.687 | 0.536 | 68.1 | a                    |
| 0.22 | 0.20 | 5.0 | 0.44 | 300                                 | 4.709 | 0.508 | 76.1 |                      |
| 0.22 | 0.20 | 5.0 | 0.44 | 300                                 | 4.706 | 0.526 | 75.6 |                      |
| 0.22 | 0.20 | 5.0 | 0.44 | 250                                 | 4.777 | 0.495 | 74.2 |                      |
| 0.22 | 0.20 | 5.0 | 0.44 | 250                                 | 4.770 | 0.488 | 73.1 |                      |
| 0.14 | 0.13 | 5.0 | 0.44 | 250                                 | 4.590 | 0.562 | 77.8 |                      |
| 0.14 | 0.13 | 5.0 | 0.44 | 300                                 | 4.529 | 0.558 | 81.2 |                      |
| 0.14 | 0.13 | 5.0 | 0.44 | 350                                 | 4.463 | 0.535 | 81.3 |                      |
| 0.14 | 0.13 | 5.0 | 0.44 | 200                                 | 4.636 | 0.535 | 69.2 | a                    |
| 0.14 | 0.13 | 5.0 | 0.44 | 250                                 | 4.553 | 0.546 | 71.5 | a                    |
| 0.14 | 0.13 | 5.0 | 0.44 | 300                                 | 4.492 | 0.545 | 74.5 | a                    |
| 0.52 | 0.50 | 0.0 | 0.20 | immiscible at room temperature (RT) |       |       |      |                      |
| 0.26 | 0.25 | 5.0 | 0.20 | immiscible when DMPA added at RT    |       |       |      |                      |
| 0.26 | 0.25 | 6.5 | 0.20 | 250                                 | 4.947 | 0.532 | 88.4 | a,b, $\gamma = -1$   |
| 0.26 | 0.25 | 6.5 | 0.20 | 300                                 | 4.865 | 0.498 | 87.8 | a,b, $\gamma = -0.5$ |
| 0.26 | 0.25 | 6.5 | 0.20 | 350                                 | 4.782 | 0.476 | 84.6 | a,b                  |
| 0.26 | 0.25 | 6.5 | 0.20 | 400                                 | 4.759 | 0.493 | 91.7 | a,b, $\gamma = -0.5$ |
| 0.26 | 0.25 | 5.0 | 0.20 | 325                                 | 4.753 | 0.450 | 73.5 | a,b                  |
| 0.26 | 0.25 | 5.0 | 0.20 | 375                                 | 4.668 | 0.447 | 69.8 | a,b                  |
| 0.26 | 0.25 | 6.5 | 0.20 | 250                                 | 4.901 | 0.524 | 79.5 | a,b                  |
| 0.26 | 0.25 | 6.5 | 0.20 | 300                                 | 4.813 | 0.497 | 77.9 | a,b                  |
| 0.26 | 0.25 | 6.5 | 0.20 | 350                                 | 4.749 | 0.485 | 78.4 | a,b                  |
| 0.26 | 0.25 | 5.0 | 0.20 | 250                                 | 4.901 | 0.535 | 79.5 | a,b                  |

|      |      |     |      |                                  |       |       |       |                      |
|------|------|-----|------|----------------------------------|-------|-------|-------|----------------------|
| 0.26 | 0.25 | 5.0 | 0.20 | 300                              | 4.813 | 0.508 | 77.9  | a,b                  |
| 0.26 | 0.25 | 5.0 | 0.20 | 350                              | 4.767 | 0.497 | 81.8  | a,b                  |
| 0.13 | 0.13 | 4.0 | 0.20 | Immiscible when DMPA added at RT |       |       |       |                      |
| 0.13 | 0.13 | 5.0 | 0.20 | 150                              | 4.912 | 0.455 | 97.8  | a,b, $\gamma = -1.3$ |
| 0.13 | 0.13 | 5.0 | 0.20 | 200                              | 4.788 | 0.438 | 98.1  | a,b, $\gamma = -0.9$ |
| 0.13 | 0.13 | 6.5 | 0.20 | 250                              | 4.786 | 0.480 | 122.0 | a,b, $\gamma = -1.1$ |
| 0.13 | 0.13 | 5.0 | 0.20 | 250                              | 4.788 | 0.465 | 122.6 | a,b, $\gamma = -1.9$ |
| 0.13 | 0.13 | 5.0 | 0.20 | 225                              | 4.845 | 0.480 | 125.8 | a,b, $\gamma = -1.6$ |
| 0.13 | 0.13 | 5.0 | 0.20 | 275                              | 4.774 | 0.491 | 130.5 | a,b, $\gamma = -1.8$ |

**Table S5.**  $k_p$  values for MEA at 30 °C determined from individual PLP experiments conducted in EtOH and EtOH/H<sub>2</sub>O mixtures. Experiments used DMPA as initiator unless otherwise indicated (<sup>a</sup>D1173 initiator).  $w_{MEA}$  and  $v_{MEA}$  are weight and volume fraction of monomer in solution, respectively, and  $\alpha_{EtOH}$  is the weight fraction of EtOH (balance H<sub>2</sub>O) in the solvent.

| $w_{MEA}$ | $v_{MEA}$ | $C_{Initiator}$<br>(mmol·L <sup>-1</sup> ) | $\alpha_{EtOH}$ | $f$<br>(Hz) | log $M_1$<br>RI | $M_1/M_2$ | RI $k_{p1} \cdot 10^{-3}$<br>(L·mol <sup>-1</sup> ·s <sup>-1</sup> ) | Notes |
|-----------|-----------|--------------------------------------------|-----------------|-------------|-----------------|-----------|----------------------------------------------------------------------|-------|
| 0.84      | 0.80      | 5.0                                        | 1.00            | 300         | 4.780           | 0.531     | 22.6                                                                 |       |
| 0.84      | 0.80      | 5.0                                        | 1.00            | 400         | 4.688           | 0.518     | 24.4                                                                 |       |
| 0.56      | 0.50      | 5.0                                        | 1.00            | 300         | 4.635           | 0.561     | 25.9                                                                 |       |
| 0.56      | 0.50      | 5.0                                        | 1.00            | 400         | 4.534           | 0.553     | 27.4                                                                 |       |
| 0.30      | 0.25      | 5.0                                        | 1.00            | 300         | 4.426           | 0.552     | 32.1                                                                 |       |
| 0.30      | 0.25      | 5.0                                        | 1.00            | 400         | 4.320           | 0.550     | 33.5                                                                 |       |
| 0.15      | 0.13      | 5.0                                        | 1.00            | 300         | 4.206           | 0.564     | 38.7                                                                 |       |
| 0.15      | 0.13      | 5.0                                        | 1.00            | 400         | 4.067           | 0.516     | 37.4                                                                 |       |
| 0.83      | 0.80      | 5.0                                        | 0.70            | 300         | 4.834           | 0.596     | 25.6                                                                 |       |
| 0.83      | 0.80      | 5.0                                        | 0.70            | 400         | 4.735           | 0.556     | 27.2                                                                 |       |
| 0.55      | 0.50      | 5.0                                        | 0.70            | 300         | 4.725           | 0.519     | 31.9                                                                 |       |
| 0.55      | 0.50      | 5.0                                        | 0.70            | 400         | 4.625           | 0.578     | 33.8                                                                 |       |
| 0.29      | 0.25      | 5.0                                        | 0.70            | 300         | 4.509           | 0.566     | 38.8                                                                 |       |
| 0.29      | 0.25      | 5.0                                        | 0.70            | 400         | 4.400           | 0.565     | 40.2                                                                 |       |
| 0.29      | 0.25      | 5.0                                        | 0.70            | 250         | 4.522           | 0.499     | 33.3                                                                 | a     |
| 0.29      | 0.25      | 5.0                                        | 0.70            | 300         | 4.474           | 0.509     | 35.8                                                                 | a     |
| 0.15      | 0.13      | 5.0                                        | 0.70            | 300         | 4.265           | 0.570     | 44.2                                                                 |       |
| 0.15      | 0.13      | 5.0                                        | 0.70            | 250         | 4.344           | 0.571     | 44.2                                                                 | a     |
| 0.15      | 0.13      | 5.0                                        | 0.70            | 300         | 4.280           | 0.577     | 45.8                                                                 | a     |
| 0.15      | 0.13      | 5.0                                        | 0.70            | 400         | 4.149           | 0.546     | 45.2                                                                 | a     |

**Table S6.  $k_p$  values for MEA at 30 °C determined from individual PLP experiments conducted in BuOH with DMPA initiator.  $w_{MEA}$  and  $v_{MEA}$  are weight and volume fraction of monomer in solution, respectively. <sup>b</sup>Polymer precipitated out of PLP solution after pulsing.**

| $w_{MEA}$ | $v_{MEA}$ | $C_{Initiator}$<br>(mmol·L <sup>-1</sup> ) | $f$<br>(Hz) | log $M_1$<br>RI | $M_1/M_2$ | RI $k_{p1} \cdot 10^{-3}$<br>(L·mol <sup>-1</sup> ·s <sup>-1</sup> ) | Notes                       |
|-----------|-----------|--------------------------------------------|-------------|-----------------|-----------|----------------------------------------------------------------------|-----------------------------|
| 0.55      | 0.50      | 5.0                                        | 300         | 4.632           | 0.553     | 25.8                                                                 |                             |
| 0.55      | 0.50      | 5.0                                        | 400         | 4.523           | 0.560     | 26.8                                                                 |                             |
| 0.55      | 0.50      | 5.0                                        | 300         | 4.731           | 0.530     | 32.1                                                                 |                             |
| 0.55      | 0.50      | 5.0                                        | 400         | 4.631           | 0.561     | 33.9                                                                 |                             |
| 0.55      | 0.50      | 5.0                                        | 380         | -               | 0.573     | 31.9                                                                 | Taken from ref <sup>8</sup> |
| 0.55      | 0.50      | 5.0                                        | 480         | -               | 0.557     | 33.3                                                                 | Taken from ref <sup>8</sup> |
| 0.55      | 0.50      | 5.0                                        | 300         | 4.708           | 0.551     | 30.6                                                                 |                             |
| 0.55      | 0.50      | 5.0                                        | 400         | 4.607           | 0.567     | 32.3                                                                 |                             |
| 0.55      | 0.50      | 5.0                                        | 380         | 4.616           | 0.556     | 31.4                                                                 |                             |
| 0.55      | 0.50      | 5.0                                        | 480         | 4.535           | 0.560     | 32.9                                                                 |                             |
| 0.29      | 0.25      | 5.0                                        | 300         | 4.457           | 0.560     | 34.5                                                                 |                             |
| 0.29      | 0.25      | 5.0                                        | 400         | 4.330           | 0.556     | 34.4                                                                 |                             |
| 0.29      | 0.25      | 5.0                                        | 300         | 4.486           | 0.558     | 36.7                                                                 |                             |
| 0.29      | 0.25      | 5.0                                        | 400         | 4.398           | 0.557     | 39.9                                                                 |                             |
| 0.15      | 0.13      | 5.0                                        | 400         | 4.115           | 0.489     | 41.9                                                                 | b                           |
| 0.15      | 0.13      | 5.0                                        | 450         | 4.108           | 0.507     | 46.4                                                                 | b                           |
| 0.15      | 0.13      | 5.0                                        | 500         | 4.078           | 0.505     | 48.2                                                                 | b                           |
| 0.15      | 0.13      | 5.0                                        | 400         | 4.134           | 0.528     | 43.5                                                                 | b                           |
| 0.15      | 0.13      | 5.0                                        | 450         | 4.105           | 0.506     | 45.8                                                                 | b                           |
| 0.15      | 0.13      | 5.0                                        | 500         | 4.054           | 0.483     | 45.2                                                                 | b                           |
| 0.15      | 0.13      | 5.0                                        | 400         | 4.127           | 0.538     | 43.1                                                                 | b                           |
| 0.15      | 0.13      | 5.0                                        | 450         | 4.072           | 0.509     | 42.7                                                                 | b                           |
| 0.15      | 0.13      | 5.0                                        | 500         | 4.060           | 0.528     | 46.2                                                                 | b                           |

**Table S7.  $k_p$  values for MEA at 30 °C determined from individual PLP experiments conducted in H<sub>2</sub>O (<sup>a</sup>D1173 initiator was used).  $w_{MEA}$  and  $v_{MEA}$  are weight and volume fraction of monomer in solution. <sup>b</sup>Polymer precipitated out of PLP solution after pulsing. Some MMDs were transformed with the parameter  $\gamma$  in order to reveal PLP structure according to a technique described in another work.<sup>9</sup>**

| $w_{MEA}$ | $v_{MEA}$ | $C_{Initiator}$<br>(mmol·L <sup>-1</sup> ) | $f$ (Hz)                                 | log $M_1$ RI | $M_1/M_2$ | RI $k_{p1} \cdot 10^{-3}$<br>(L·mol <sup>-1</sup> ·s <sup>-1</sup> ) | Notes                            |
|-----------|-----------|--------------------------------------------|------------------------------------------|--------------|-----------|----------------------------------------------------------------------|----------------------------------|
| 0.05      | 0.05      | 5.0                                        | Immiscible with DMPA at room temperature |              |           |                                                                      |                                  |
| 0.05      | 0.05      | 5.0                                        | 300                                      | 4.507        | 0.455     | 192.1                                                                | <sup>a,b</sup> , $\gamma = -1.0$ |
| 0.05      | 0.05      | 5.0                                        | 350                                      | 4.477        | 0.538     | 209.2                                                                | <sup>a,b</sup> , $\gamma = -1.4$ |
| 0.05      | 0.05      | 5.0                                        | 250                                      | 4.547        | 0.474     | 175.5                                                                | <sup>a,b</sup> , $\gamma = -1.3$ |
| 0.05      | 0.05      | 5.0                                        | 250                                      | 4.607        | 0.500     | 201.5                                                                | <sup>a,b</sup> , $\gamma = -1.3$ |



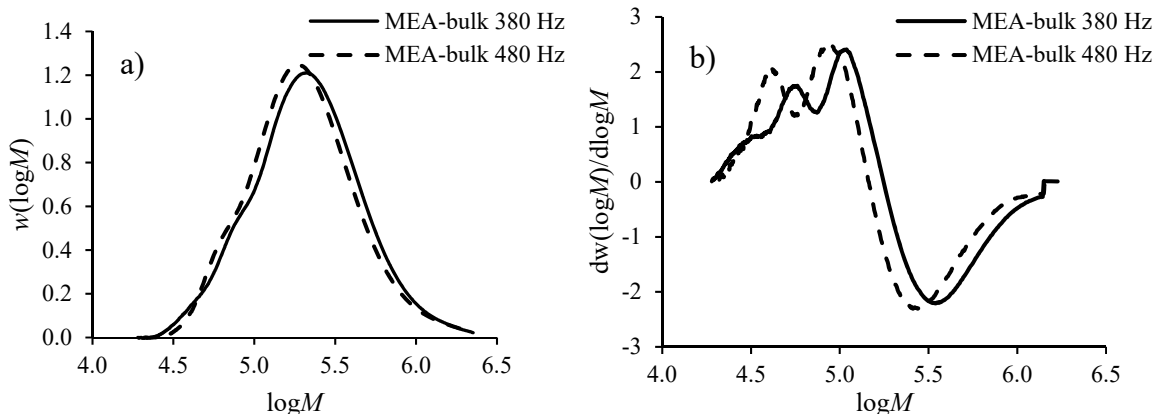

**Figure S3. (a)  $w(\log M)$  molar mass distribution and (b) differential  $w(\log M)$  distribution for bulk MEA at 30 °C at 380 Hz and 480 Hz with 5 mmol·L<sup>-1</sup> DMPA.**

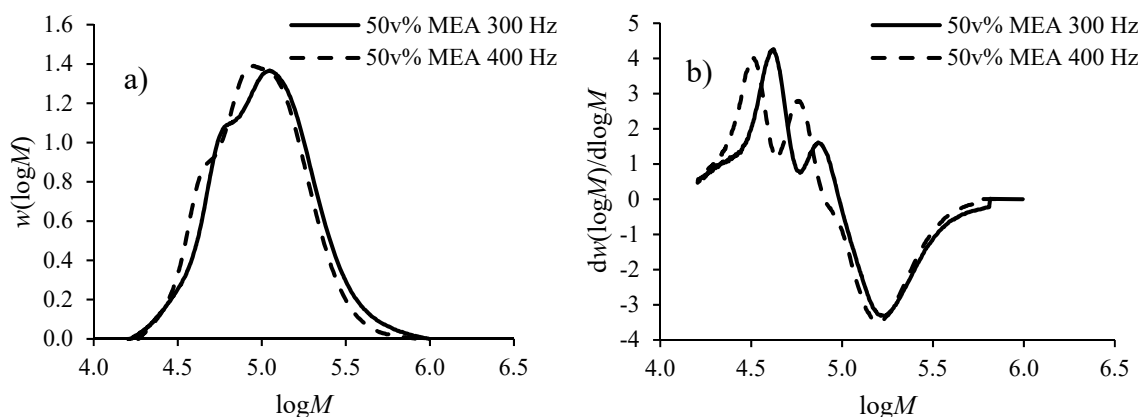

**Figure S4. (a)  $w(\log M)$  molar mass distribution and (b) differential  $w(\log M)$  distribution for 50 v% MEA in BuOH at 30 °C at 300 Hz and 400 Hz with 5 mmol·L<sup>-1</sup> DMPA.**

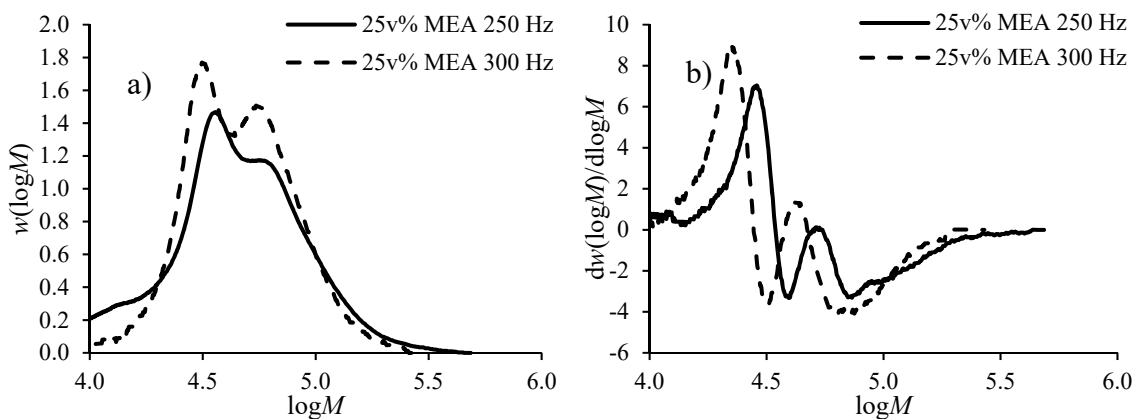

**Figure S5. (a)  $w(\log M)$  molar mass distribution and (b) differential  $w(\log M)$  distribution for 25 v% MEA in MeOH at 30 °C at 300 Hz and 400 Hz with 5 mmol·L<sup>-1</sup> DMPA.**

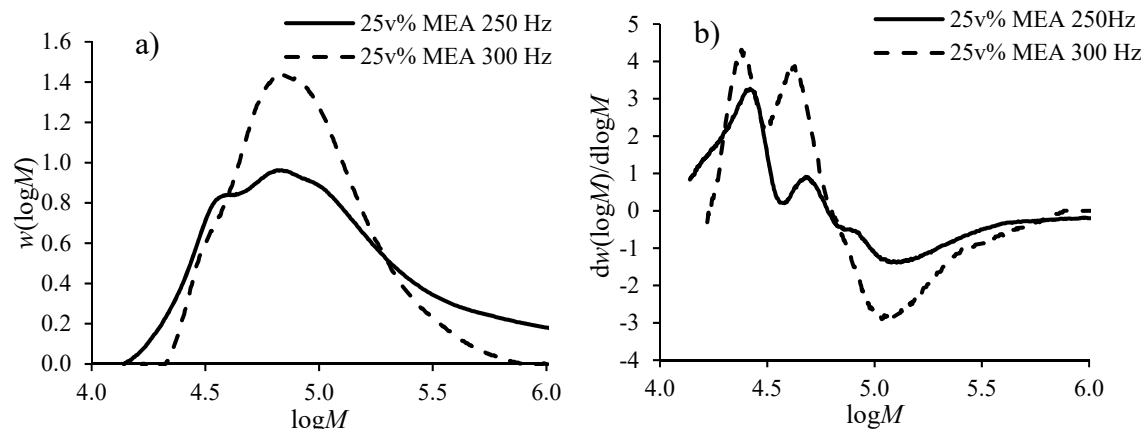

**Figure S6.** (a)  $w(\log M)$  molar mass distribution and (b) differential  $w(\log M)$  distribution for 25 v% MEA in 75v:25v MeOH:H<sub>2</sub>O at 30 °C at 250 Hz and 300 Hz 5 mmol·L<sup>-1</sup> DMPA.

**Table S8.** A comparison of mean  $k_p$  values ( $k_p^{mean}$ ) of MEA from PLP experiments at 30 °C using two different photoinitiators, DMPA and D1173, at identical conditions (see Table S4 and Table S5 for details). The absolute difference  $|\Delta|$  (%) is calculated as  $100 \cdot (k_{p, DMPA}^{mean} - k_{p, D1173}^{mean}) / k_{p, DMPA}^{mean} \cdot w_{MEA}$  and  $v_{MEA}$  are weight and volume fraction of monomer in solution, respectively, and  $\alpha_x$  is the weight fraction of alcohol  $x$  (balance H<sub>2</sub>O) in the solvent.

| $w_{MEA}$ | $v_{MEA}$ | Solvent               | $\alpha_x$ | $k_{p, DMPA}^{mean} \cdot 10^{-3}$<br>(L·mol <sup>-1</sup> ·s <sup>-1</sup> ) | $k_{p, D1173}^{mean} \cdot 10^{-3}$<br>(L·mol <sup>-1</sup> ·s <sup>-1</sup> ) | $ \Delta $ (%) |
|-----------|-----------|-----------------------|------------|-------------------------------------------------------------------------------|--------------------------------------------------------------------------------|----------------|
| 0.29      | 0.25      | MeOH/H <sub>2</sub> O | 0.70       | 39.2                                                                          | 35.5                                                                           | 9.3            |
| 0.15      | 0.13      | MeOH/H <sub>2</sub> O | 0.70       | 51.9                                                                          | 46.6                                                                           | 10.2           |
| 0.27      | 0.25      | MeOH/H <sub>2</sub> O | 0.44       | 69.9                                                                          | 68.0                                                                           | 2.8            |
| 0.14      | 0.13      | MeOH/H <sub>2</sub> O | 0.44       | 80.1                                                                          | 71.8                                                                           | 10.4           |
| 0.29      | 0.25      | EtOH/H <sub>2</sub> O | 0.70       | 39.5                                                                          | 34.5                                                                           | 12.6           |
| 0.15      | 0.13      | EtOH/H <sub>2</sub> O | 0.70       | 44.2                                                                          | 45.1                                                                           | 1.9            |

**Table S9.**  $k_p$  values for MA determined from PLP experiments conducted in EtOH and EtOH/H<sub>2</sub>O mixtures at 30 °C. Experiments used D1173 as initiator unless otherwise indicated (<sup>a</sup>DMPA initiator).  $w_{MA}$  and  $v_{MA}$  are weight and volume fraction of monomer in solution, respectively, and  $\alpha_{EtOH}$  is the weight fraction of EtOH (balance H<sub>2</sub>O) in the solvent.

| $w_{MA}$ | $v_{MA}$ | $C_{Initiator}$<br>(mmol·L <sup>-1</sup> ) | $\alpha_{EtOH}$ | $f$<br>(Hz) | log $M_1$<br>RI | $M_1/M_2$ | RI $k_p \cdot 10^{-3}$<br>(L·mol <sup>-1</sup> ·s <sup>-1</sup> ) | Notes |
|----------|----------|--------------------------------------------|-----------------|-------------|-----------------|-----------|-------------------------------------------------------------------|-------|
| 0.55     | 0.50     | 5.0                                        | 1.00            | 200         | 4.620           | 0.471     | 17.7                                                              | a     |
| 0.55     | 0.50     | 5.0                                        | 1.00            | 300         | 4.470           | 0.515     | 18.8                                                              | a     |
| 0.55     | 0.50     | 5.0                                        | 1.00            | 300         | 4.480           | 0.504     | 19.2                                                              | a     |
| 0.55     | 0.50     | 5.0                                        | 1.00            | 400         | 4.359           | 0.513     | 19.4                                                              | a     |
| 0.55     | 0.50     | 5.0                                        | 1.00            | 400         | 4.369           | 0.538     | 19.9                                                              | a     |
| 0.55     | 0.50     | 5.0                                        | 1.00            | 500         | 4.285           | 0.536     | 20.5                                                              | a     |
| 0.50     | 0.45     | 5.0                                        | 1.00            | 300         | 4.565           | 0.468     | 25.7                                                              |       |
| 0.50     | 0.45     | 5.0                                        | 1.00            | 400         | 4.426           | 0.511     | 24.9                                                              |       |
| 0.50     | 0.45     | 5.0                                        | 1.00            | 500         | 4.279           | 0.552     | 22.2                                                              |       |
| 0.20     | 0.17     | 5.0                                        | 1.00            | 300         | 4.195           | 0.566     | 28.8                                                              |       |
| 0.20     | 0.17     | 5.0                                        | 1.00            | 400         | 4.067           | 0.578     | 28.6                                                              |       |
| 0.20     | 0.17     | 5.0                                        | 1.00            | 500         | 3.985           | 0.528     | 29.6                                                              |       |
| 0.10     | 0.08     | 5.0                                        | 1.00            | 200         | 4.094           | 0.509     | 30.7                                                              |       |
| 0.10     | 0.08     | 5.0                                        | 1.00            | 300         | 3.918           | 0.474     | 30.7                                                              |       |
| 0.10     | 0.08     | 5.0                                        | 1.00            | 400         | 3.819           | 0.500     | 32.6                                                              |       |
| 0.10     | 0.08     | 5.0                                        | 1.00            | 500         | 3.745           | 0.560     | 34.3                                                              |       |
| 0.50     | 0.47     | 5.0                                        | 0.75            | 200         | 4.804           | 0.481     | 28.9                                                              |       |
| 0.50     | 0.47     | 5.0                                        | 0.75            | 300         | 4.652           | 0.476     | 30.5                                                              |       |
| 0.50     | 0.47     | 5.0                                        | 0.75            | 400         | 4.539           | 0.514     | 31.4                                                              |       |
| 0.50     | 0.47     | 5.0                                        | 0.75            | 500         | 4.445           | 0.509     | 31.6                                                              |       |
| 0.20     | 0.18     | 5.0                                        | 0.75            | 300         | 4.311           | 0.548     | 36.0                                                              |       |
| 0.20     | 0.18     | 5.0                                        | 0.75            | 400         | 4.215           | 0.558     | 38.5                                                              |       |
| 0.20     | 0.18     | 5.0                                        | 0.75            | 500         | 4.13            | 0.566     | 39.6                                                              |       |
| 0.10     | 0.09     | 5.0                                        | 0.75            | 300         | 4.041           | 0.548     | 39.1                                                              |       |
| 0.10     | 0.09     | 5.0                                        | 0.75            | 400         | 3.947           | 0.522     | 42.0                                                              |       |
| 0.10     | 0.09     | 5.0                                        | 0.75            | 500         | 3.876           | 0.526     | 44.6                                                              |       |
| 0.50     | 0.48     | 5.0                                        | 0.50            | 300         | 4.684           | 0.441     | 31.8                                                              |       |
| 0.50     | 0.48     | 5.0                                        | 0.50            | 400         | 4.582           | 0.467     | 33.5                                                              |       |
| 0.50     | 0.48     | 5.0                                        | 0.50            | 500         | 4.504           | 0.522     | 35.0                                                              |       |
| 0.20     | 0.19     | 5.0                                        | 0.50            | 400         | 4.356           | 0.458     | 50.8                                                              |       |
| 0.20     | 0.19     | 5.0                                        | 0.50            | 500         | 4.285           | 0.543     | 53.9                                                              |       |
| 0.10     | 0.09     | 5.0                                        | 0.50            | 300         | 4.251           | 0.509     | 60.1                                                              |       |
| 0.10     | 0.09     | 5.0                                        | 0.50            | 400         | 4.150           | 0.573     | 63.5                                                              |       |
| 0.10     | 0.09     | 5.0                                        | 0.50            | 500         | 4.031           | 0.500     | 60.4                                                              |       |
| 0.05     | 0.04     | 5.0                                        | 0.50            | 400         | 3.909           | 0.525     | 73.2                                                              |       |
| 0.05     | 0.04     | 5.0                                        | 0.50            | 500         | 3.831           | 0.439     | 76.5                                                              |       |
| 0.10     | 0.10     | 5.0                                        | 0.25            | 300         | 4.562           | 0.435     | 115.9                                                             |       |
| 0.10     | 0.10     | 5.0                                        | 0.25            | 400         | 4.458           | 0.491     | 121.6                                                             |       |

|      |      |     |      |     |       |       |       |  |
|------|------|-----|------|-----|-------|-------|-------|--|
| 0.10 | 0.10 | 5.0 | 0.25 | 500 | 4.362 | 0.472 | 121.9 |  |
| 0.05 | 0.05 | 5.0 | 0.25 | 400 | 4.234 | 0.451 | 145.7 |  |
| 0.05 | 0.05 | 5.0 | 0.25 | 500 | 4.120 | 0.495 | 140.1 |  |

**Table S10.**  $k_p$  values for MA at 40-60 °C determined from PLP experiments conducted in EtOH and EtOH/H<sub>2</sub>O mixtures using DMPA as initiator unless otherwise stated (<sup>a</sup>D1173) initiator).  $w_{MA}$  and  $v_{MA}$  are weight and volume fraction of monomer in solution, respectively, and  $\alpha_{EtOH}$  is the weight fraction of EtOH (balance H<sub>2</sub>O) in the solvent.

| $T$<br>(°C) | $w_{MA}$ | $v_{MA}$ | $C_{Initiator}$<br>(mmol·L <sup>-1</sup> ) | $\alpha_{EtOH}$ | $f$<br>(Hz) | $\log M_1$<br>RI | $M_1/M_2$ | RI $k_{p1} \cdot 10^{-3}$<br>(L·mol <sup>-1</sup> ·s <sup>-1</sup> ) | Notes |
|-------------|----------|----------|--------------------------------------------|-----------------|-------------|------------------|-----------|----------------------------------------------------------------------|-------|
| 40          | 0.55     | 0.50     | 5.0                                        | 1.00            | 300         | 4.545            | 0.491     | 22.6                                                                 |       |
| 40          | 0.55     | 0.50     | 5.0                                        | 1.00            | 300         | 4.535            | 0.493     | 22.1                                                                 |       |
| 40          | 0.55     | 0.50     | 5.0                                        | 1.00            | 400         | 4.440            | 0.520     | 23.7                                                                 |       |
| 40          | 0.55     | 0.50     | 5.0                                        | 1.00            | 400         | 4.430            | 0.522     | 23.1                                                                 |       |
| 40          | 0.55     | 0.50     | 5.0                                        | 1.00            | 500         | 4.350            | 0.525     | 24.0                                                                 |       |
| 40          | 0.10     | 0.08     | 5.0                                        | 1.00            | 400         | 3.829            | 0.440     | 34.0                                                                 | a     |
| 40          | 0.10     | 0.08     | 5.0                                        | 1.00            | 500         | 3.768            | 0.484     | 37.0                                                                 | a     |
| 40          | 0.10     | 0.08     | 5.0                                        | 1.00            | 500         | 3.750            | 0.513     | 35.5                                                                 | a     |
| 50          | 0.55     | 0.50     | 5.0                                        | 1.00            | 300         | 4.563            | 0.422     | 23.8                                                                 |       |
| 50          | 0.55     | 0.50     | 5.0                                        | 1.00            | 400         | 4.467            | 0.513     | 25.5                                                                 |       |
| 50          | 0.55     | 0.50     | 5.0                                        | 1.00            | 500         | 4.401            | 0.532     | 27.4                                                                 |       |
| 50          | 0.10     | 0.08     | 5.0                                        | 1.00            | 400         | 3.888            | 0.463     | 39.4                                                                 | a     |
| 50          | 0.10     | 0.08     | 5.0                                        | 1.00            | 500         | 3.797            | 0.428     | 40.0                                                                 | a     |
| 50          | 0.10     | 0.08     | 5.0                                        | 1.00            | 500         | 3.786            | 0.428     | 39.0                                                                 | a     |
| 60          | 0.55     | 0.50     | 5.0                                        | 1.00            | 500         | 4.427            | 0.505     | 29.4                                                                 |       |
| 60          | 0.10     | 0.08     | 5.0                                        | 1.00            | 500         | 3.805            | 0.450     | 41.2                                                                 | a     |
| 60          | 0.10     | 0.08     | 5.0                                        | 1.00            | 500         | 3.808            | 0.442     | 41.4                                                                 | a     |
| 40          | 0.10     | 0.09     | 5.0                                        | 0.75            | 400         | 3.975            | 0.562     | 45.0                                                                 | a     |
| 40          | 0.10     | 0.09     | 5.0                                        | 0.75            | 500         | 3.893            | 0.489     | 46.6                                                                 | a     |
| 40          | 0.10     | 0.09     | 5.0                                        | 0.75            | 500         | 3.890            | 0.433     | 46.4                                                                 | a     |
| 50          | 0.10     | 0.09     | 5.0                                        | 0.75            | 500         | 3.918            | 0.442     | 49.8                                                                 | a     |
| 50          | 0.10     | 0.09     | 5.0                                        | 0.75            | 400         | 4.000            | 0.420     | 48.2                                                                 | a     |
| 60          | 0.10     | 0.09     | 5.0                                        | 0.75            | 500         | 3.929            | 0.450     | 51.6                                                                 | a     |
| 60          | 0.10     | 0.09     | 5.0                                        | 0.75            | 500         | 3.915            | 0.530     | 50.0                                                                 | a     |
| 40          | 0.53     | 0.50     | 5.0                                        | 0.70            | 300         | 4.630            | 0.468     | 27.4                                                                 |       |
| 40          | 0.53     | 0.50     | 5.0                                        | 0.70            | 400         | 4.531            | 0.498     | 29.1                                                                 |       |
| 40          | 0.53     | 0.50     | 5.0                                        | 0.70            | 500         | 4.437            | 0.526     | 29.3                                                                 |       |
| 40          | 0.10     | 0.09     | 5.0                                        | 0.50            | 400         | 4.172            | 0.494     | 67.5                                                                 | a     |
| 40          | 0.10     | 0.09     | 5.0                                        | 0.50            | 500         | 4.078            | 0.506     | 67.9                                                                 | a     |
| 50          | 0.10     | 0.09     | 5.0                                        | 0.50            | 400         | 4.222            | 0.526     | 76.4                                                                 | a     |
| 50          | 0.10     | 0.09     | 5.0                                        | 0.50            | 500         | 4.137            | 0.535     | 78.5                                                                 | a     |
| 60          | 0.10     | 0.09     | 5.0                                        | 0.50            | 400         | 4.246            | 0.443     | 81.4                                                                 | a     |
| 60          | 0.10     | 0.09     | 5.0                                        | 0.50            | 500         | 4.16             | 0.564     | 83.5                                                                 | a     |

|    |      |      |     |      |     |       |       |       |   |
|----|------|------|-----|------|-----|-------|-------|-------|---|
| 40 | 0.10 | 0.10 | 5.0 | 0.25 | 400 | 4.461 | 0.478 | 123.1 | a |
| 40 | 0.10 | 0.10 | 5.0 | 0.25 | 500 | 4.374 | 0.446 | 126.0 | a |
| 50 | 0.10 | 0.10 | 5.0 | 0.25 | 500 | 4.504 | 0.540 | 136.8 | a |
| 50 | 0.10 | 0.10 | 5.0 | 0.25 | 400 | 4.390 | 0.512 | 131.5 | a |

**Table S11.  $k_p$  values for MA at various temperatures determined from PLP experiments conducted in MeOH and MeOH/H<sub>2</sub>O mixtures. Experiments used DMPA as initiator.  $w_{MA}$  and  $v_{MA}$  are weight and volume fraction of monomer in solution, respectively, and  $\alpha_{MeOH}$  is the weight fraction of MeOH (balance H<sub>2</sub>O) in the solvent.**

| $T$<br>(°C) | $w_{MA}$ | $v_{MA}$ | $C_{Initiator}$<br>(mmol·L <sup>-1</sup> ) | $\alpha_{MeOH}$ | $f$<br>(Hz) | $\log M_1$<br>RI | $M_1/M_2$ | RI $k_{p1} \cdot 10^{-3}$<br>(L·mol <sup>-1</sup> ·s <sup>-1</sup> ) |
|-------------|----------|----------|--------------------------------------------|-----------------|-------------|------------------|-----------|----------------------------------------------------------------------|
| 3           | 0.50     | 0.45     | 5.0                                        | 1.00            | 250         | 4.274            | 0.54      | 10.7                                                                 |
| 3           | 0.50     | 0.45     | 5.0                                        | 1.00            | 250         | 4.272            | 0.54      | 10.7                                                                 |
| 3           | 0.50     | 0.45     | 5.0                                        | 1.00            | 500         | 3.946            | 0.47      | 10.1                                                                 |
| 3           | 0.50     | 0.45     | 5.0                                        | 1.00            | 500         | 3.945            | 0.47      | 10.0                                                                 |
| 3           | 0.50     | 0.46     | 5.0                                        | 0.80            | 250         | 4.344            | 0.55      | 12.4                                                                 |
| 3           | 0.50     | 0.46     | 5.0                                        | 0.80            | 250         | 4.341            | 0.55      | 12.3                                                                 |
| 3           | 0.50     | 0.46     | 5.0                                        | 0.80            | 500         | 4.069            | 0.51      | 13.2                                                                 |
| 3           | 0.50     | 0.46     | 5.0                                        | 0.80            | 500         | 4.068            | 0.51      | 13.1                                                                 |
| 15          | 0.50     | 0.45     | 5.0                                        | 1.00            | 250         | 4.360            | 0.55      | 13.3                                                                 |
| 15          | 0.50     | 0.45     | 5.0                                        | 1.00            | 250         | 4.347            | 0.55      | 12.9                                                                 |
| 15          | 0.50     | 0.45     | 5.0                                        | 1.00            | 250         | 4.347            | 0.55      | 12.9                                                                 |
| 15          | 0.50     | 0.45     | 5.0                                        | 1.00            | 250         | 4.360            | 0.55      | 13.3                                                                 |
| 15          | 0.50     | 0.45     | 5.0                                        | 1.00            | 500         | 4.081            | 0.49      | 13.9                                                                 |
| 15          | 0.50     | 0.45     | 5.0                                        | 1.00            | 500         | 4.076            | 0.49      | 13.8                                                                 |
| 15          | 0.50     | 0.45     | 5.0                                        | 1.00            | 500         | 4.096            | 0.49      | 14.4                                                                 |
| 15          | 0.50     | 0.46     | 5.0                                        | 0.80            | 250         | 4.442            | 0.55      | 15.8                                                                 |
| 15          | 0.50     | 0.46     | 5.0                                        | 0.80            | 250         | 4.442            | 0.55      | 15.8                                                                 |
| 15          | 0.50     | 0.46     | 5.0                                        | 0.80            | 500         | 4.194            | 0.53      | 17.8                                                                 |
| 15          | 0.50     | 0.46     | 5.0                                        | 0.80            | 500         | 4.191            | 0.53      | 17.7                                                                 |
| 25          | 0.50     | 0.45     | 5.0                                        | 1.00            | 250         | 4.474            | 0.54      | 17.5                                                                 |
| 25          | 0.50     | 0.45     | 5.0                                        | 1.00            | 250         | 4.463            | 0.54      | 17.0                                                                 |
| 25          | 0.50     | 0.45     | 5.0                                        | 1.00            | 500         | 4.181            | 0.53      | 17.7                                                                 |
| 25          | 0.50     | 0.45     | 5.0                                        | 1.00            | 500         | 4.183            | 0.53      | 17.8                                                                 |
| 25          | 0.50     | 0.46     | 5.0                                        | 0.80            | 250         | 4.558            | 0.55      | 20.8                                                                 |
| 25          | 0.50     | 0.46     | 5.0                                        | 0.80            | 250         | 4.553            | 0.55      | 20.6                                                                 |
| 25          | 0.50     | 0.46     | 5.0                                        | 0.80            | 500         | 4.292            | 0.55      | 22.5                                                                 |
| 25          | 0.50     | 0.46     | 5.0                                        | 0.80            | 500         | 4.302            | 0.54      | 23.0                                                                 |
| 40          | 0.50     | 0.45     | 5.0                                        | 1.00            | 250         | 4.564            | 0.55      | 22.0                                                                 |
| 40          | 0.50     | 0.45     | 5.0                                        | 1.00            | 250         | 4.565            | 0.56      | 22.0                                                                 |
| 40          | 0.50     | 0.45     | 5.0                                        | 1.00            | 500         | 4.263            | 0.55      | 21.9                                                                 |
| 40          | 0.50     | 0.45     | 5.0                                        | 1.00            | 500         | 4.261            | 0.55      | 21.8                                                                 |
| 40          | 0.50     | 0.46     | 5.0                                        | 0.80            | 250         | 4.658            | 0.55      | 26.8                                                                 |
| 40          | 0.50     | 0.46     | 5.0                                        | 0.80            | 250         | 4.658            | 0.55      | 26.8                                                                 |

|    |      |      |     |      |     |       |      |      |
|----|------|------|-----|------|-----|-------|------|------|
| 40 | 0.50 | 0.46 | 5.0 | 0.80 | 500 | 4.410 | 0.56 | 30.2 |
| 40 | 0.50 | 0.46 | 5.0 | 0.80 | 500 | 4.412 | 0.56 | 30.3 |
| 50 | 0.50 | 0.45 | 5.0 | 1.00 | 250 | 4.631 | 0.53 | 25.9 |
| 50 | 0.50 | 0.45 | 5.0 | 1.00 | 250 | 4.627 | 0.55 | 25.6 |
| 50 | 0.50 | 0.45 | 5.0 | 1.00 | 500 | 4.629 | 0.57 | 25.8 |
| 50 | 0.50 | 0.45 | 5.0 | 1.00 | 500 | 4.631 | 0.56 | 25.9 |
| 50 | 0.50 | 0.45 | 5.0 | 1.00 | 250 | 4.621 | 0.54 | 25.4 |
| 50 | 0.50 | 0.45 | 5.0 | 1.00 | 250 | 4.624 | 0.52 | 25.6 |
| 50 | 0.50 | 0.45 | 5.0 | 1.00 | 250 | 4.404 | 0.58 | 30.6 |
| 50 | 0.50 | 0.45 | 5.0 | 1.00 | 250 | 4.403 | 0.58 | 30.5 |
| 50 | 0.50 | 0.45 | 5.0 | 1.00 | 500 | 4.415 | 0.58 | 31.4 |
| 50 | 0.50 | 0.45 | 5.0 | 1.00 | 500 | 4.417 | 0.58 | 31.6 |
| 50 | 0.50 | 0.45 | 5.0 | 1.00 | 500 | 4.418 | 0.58 | 31.7 |
| 50 | 0.50 | 0.45 | 5.0 | 1.00 | 250 | 4.414 | 0.57 | 31.4 |
| 50 | 0.50 | 0.45 | 5.0 | 1.00 | 250 | 4.398 | 0.57 | 30.2 |
| 50 | 0.50 | 0.45 | 5.0 | 1.00 | 500 | 4.406 | 0.57 | 30.8 |
| 50 | 0.50 | 0.45 | 5.0 | 1.00 | 500 | 4.409 | 0.58 | 31.2 |
| 50 | 0.50 | 0.45 | 5.0 | 1.00 | 250 | 4.409 | 0.58 | 31.2 |
| 50 | 0.50 | 0.45 | 5.0 | 1.00 | 250 | 4.565 | –    | 22.3 |
| 50 | 0.50 | 0.45 | 5.0 | 1.00 | 250 | 4.567 | 0.51 | 22.4 |
| 50 | 0.50 | 0.45 | 5.0 | 1.00 | 500 | 4.346 | 0.57 | 26.9 |
| 50 | 0.50 | 0.45 | 5.0 | 1.00 | 500 | 4.344 | 0.57 | 26.8 |
| 50 | 0.50 | 0.46 | 5.0 | 0.75 | 250 | 4.700 | 0.56 | 29.9 |
| 50 | 0.50 | 0.46 | 5.0 | 0.75 | 250 | 4.699 | 0.56 | 29.9 |
| 50 | 0.50 | 0.46 | 5.0 | 0.75 | 500 | 4.475 | 0.58 | 35.6 |
| 50 | 0.50 | 0.46 | 5.0 | 0.75 | 500 | 4.470 | 0.58 | 35.1 |
| 60 | 0.50 | 0.45 | 5.0 | 1.00 | 500 | 4.386 | 0.61 | 29.9 |
| 60 | 0.50 | 0.45 | 5.0 | 1.00 | 500 | 4.389 | 0.60 | 30.1 |
| 60 | 0.50 | 0.46 | 5.0 | 0.75 | 500 | 4.527 | 0.63 | 40.6 |
| 60 | 0.50 | 0.46 | 5.0 | 0.75 | 500 | 4.524 | 0.62 | 40.3 |

**Table S12.  $k_p$  values for MA at various temperatures determined from PLP experiments conducted in H<sub>2</sub>O using D1173 as initiator.  $w_{MA}$  and  $v_{MA}$  are weight and volume fraction of monomer in solution.**

| $T$<br>(°C) | $w_{MA}$ | $v_{MA}$ | $C_{Initiator}$<br>(mmol·L <sup>-1</sup> ) | $f$<br>(Hz) | $\log M_1$<br>RI | $M_1/M_2$ | RI $k_{p1} \cdot 10^{-3}$<br>(L·mol <sup>-1</sup> ·s <sup>-1</sup> ) |
|-------------|----------|----------|--------------------------------------------|-------------|------------------|-----------|----------------------------------------------------------------------|
| 30          | 0.05     | 0.05     | 5.0                                        | 300         | 4.532            | 0.501     | 214.9                                                                |
| 30          | 0.05     | 0.05     | 5.0                                        | 400         | 4.406            | 0.495     | 214.4                                                                |
| 30          | 0.05     | 0.05     | 5.0                                        | 500         | 4.315            | 0.497     | 217.5                                                                |
| 30          | 0.05     | 0.05     | 5.0                                        | 150         | 4.816            | 0.419     | 212.6                                                                |
| 30          | 0.05     | 0.05     | 5.0                                        | 200         | 4.726            | 0.410     | 230.4                                                                |
| 30          | 0.05     | 0.05     | 5.0                                        | 300         | 4.573            | 0.511     | 243.0                                                                |
| 30          | 0.05     | 0.05     | 5.0                                        | 400         | 4.442            | 0.489     | 239.6                                                                |
| 30          | 0.05     | 0.05     | 5.0                                        | 500         | 4.365            | 0.508     | 250.9                                                                |
| 30          | 0.05     | 0.05     | 5.0                                        | 500         | 4.364            | 0.504     | 237.9                                                                |
| 30          | 0.05     | 0.05     | 5.0                                        | 500         | 4.371            | 0.506     | 241.7                                                                |
| 30          | 0.05     | 0.05     | 5.0                                        | 500         | 4.385            | 0.490     | 249.9                                                                |
| 30          | 0.05     | 0.05     | 5.0                                        | 500         | 4.383            | 0.495     | 248.8                                                                |
| 30          | 0.04     | 0.04     | 5.0                                        | 500         | 4.263            | 0.491     | 236.8                                                                |
| 30          | 0.04     | 0.04     | 5.0                                        | 500         | 4.273            | 0.490     | 242.3                                                                |
| 30          | 0.04     | 0.04     | 5.0                                        | 500         | 4.259            | 0.494     | 232.9                                                                |
| 30          | 0.04     | 0.04     | 5.0                                        | 500         | 4.259            | 0.498     | 232.9                                                                |
| 30          | 0.03     | 0.03     | 5.0                                        | 500         | 4.140            | 0.472     | 240.6                                                                |
| 30          | 0.03     | 0.03     | 5.0                                        | 500         | 4.136            | 0.472     | 238.4                                                                |
| 30          | 0.03     | 0.03     | 5.0                                        | 500         | 4.141            | 0.476     | 242.1                                                                |
| 30          | 0.03     | 0.03     | 5.0                                        | 500         | 4.143            | 0.476     | 243.3                                                                |
| 30          | 0.02     | 0.02     | 5.0                                        | 500         | 3.932            | 0.457     | 236.5                                                                |
| 30          | 0.02     | 0.02     | 5.0                                        | 500         | 3.932            | 0.458     | 236.5                                                                |
| 30          | 0.02     | 0.02     | 5.0                                        | 500         | 3.952            | 0.456     | 232.9                                                                |
| 30          | 0.02     | 0.02     | 5.0                                        | 500         | 3.956            | 0.460     | 235.1                                                                |
| 30          | 0.02     | 0.02     | 5.0                                        | 500         | 3.989            | 0.457     | 243.9                                                                |
| 30          | 0.02     | 0.02     | 5.0                                        | 500         | 3.989            | 0.448     | 243.9                                                                |
| 40          | 0.05     | 0.05     | 5.0                                        | 300         | 4.570            | 0.462     | 235.6                                                                |
| 40          | 0.05     | 0.05     | 5.0                                        | 400         | 4.471            | 0.500     | 250.1                                                                |
| 40          | 0.05     | 0.05     | 5.0                                        | 500         | 4.384            | 0.521     | 255.8                                                                |
| 50          | 0.05     | 0.05     | 5.0                                        | 300         | 4.588            | 0.411     | 246.8                                                                |
| 50          | 0.05     | 0.05     | 5.0                                        | 400         | 4.491            | 0.473     | 263.2                                                                |
| 50          | 0.05     | 0.05     | 5.0                                        | 500         | 4.384            | 0.479     | 257.2                                                                |

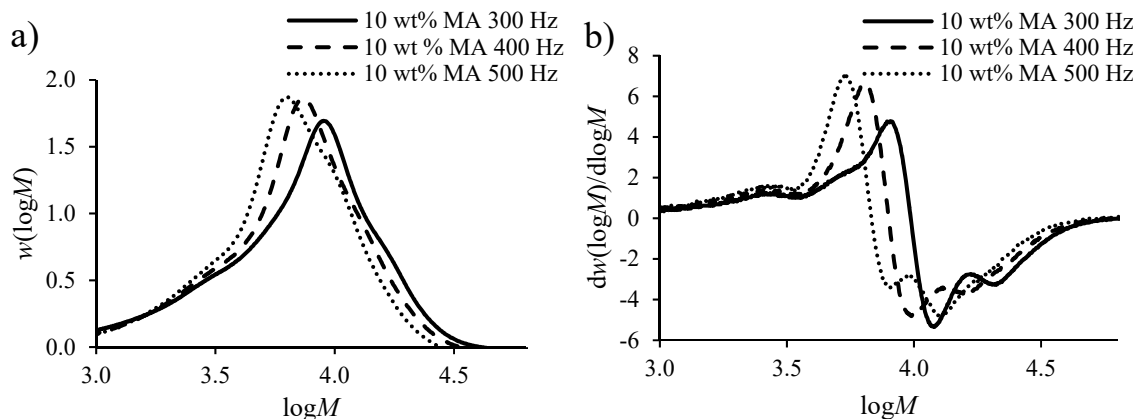

**Figure S7. (a)  $w(\log M)$  molar mass distribution and (b) differential  $w(\log M)$  distribution for 10 wt % MA in EtOH at 30 °C at 300 Hz, 200 Hz and 400 Hz with 5 mmol·L<sup>-1</sup> D1173.**

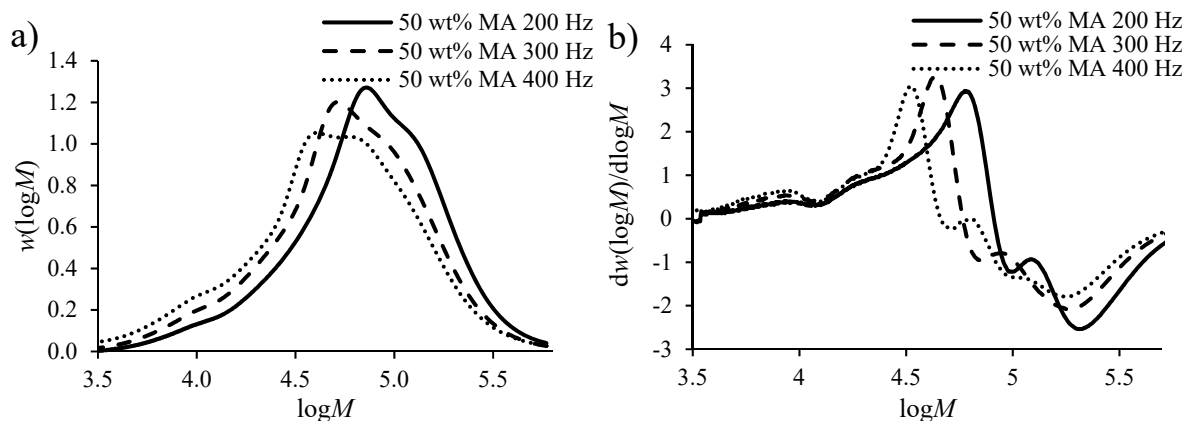

**Figure S8. (a)  $w(\log M)$  molar mass distribution and (b) differential  $w(\log M)$  distribution for 50 wt % MA,  $\alpha_{EtOH} = 0.75$  at 30 °C at 200 Hz, 300 Hz, 400 Hz and 500 Hz with 5 mmol·L<sup>-1</sup> D1173.**

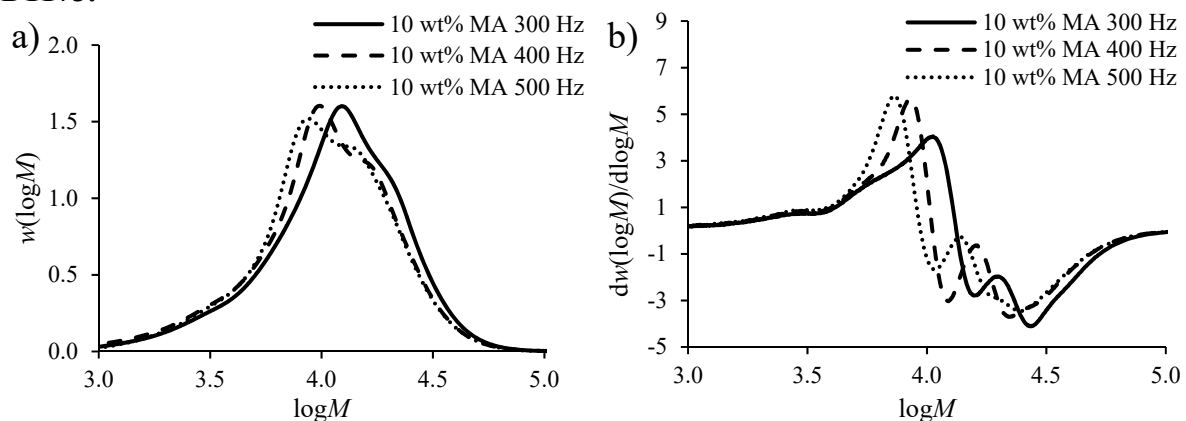

**Figure S9. (a)  $w(\log M)$  molar mass distribution and (b) differential  $w(\log M)$  distribution for 10 wt % MA,  $\alpha_{EtOH} = 0.75$  at 30 °C at 300 Hz, 400 Hz and 500 Hz with 5 mmol·L<sup>-1</sup> D1173.**



**Table S13. Arrhenius parameters determined from fitting of MA  $k_p$  results.**

|                                                                                                    | $A \cdot 10^{-7}$<br>( $\text{L} \cdot \text{mol}^{-1} \cdot \text{s}^{-1}$ ) | $E_A$<br>( $\text{kJ} \cdot \text{mol}^{-1}$ ) | $k_p \cdot 10^{-3}$ (30 °C)<br>( $\text{L} \cdot \text{mol}^{-1} \cdot \text{s}^{-1}$ ) | % increase<br>from bulk $k_p$ |
|----------------------------------------------------------------------------------------------------|-------------------------------------------------------------------------------|------------------------------------------------|-----------------------------------------------------------------------------------------|-------------------------------|
| bulk (IUPAC) <sup>1</sup>                                                                          | 1.41                                                                          | 17.3                                           | 14.7                                                                                    |                               |
| $w_{MA}=0.55$ , $\alpha_{EtOH}=1.00$ and<br>$w_{MA}=0.50$ , $\alpha_{MeOH}=1.00$<br>(combined fit) | 0.24±0.27                                                                     | 12.1±3.1                                       | 19.3                                                                                    | 30                            |
| $w_{MA}=0.53$ , $\alpha_{EtOH}=0.75$ and<br>$w_{MA}=0.50$ , $\alpha_{MeOH}=0.80$<br>(combined fit) | 0.60±1.07                                                                     | 13.9±4.7                                       | 24.1                                                                                    | 60                            |

**Table S14. Best-fit values of  $C$ , with 95% confidence intervals, at 30 °C from functional representation of  $k_p^{MEA} \left( \frac{\text{L}}{\text{mol} \cdot \text{s}} \right) = k_{p, bulk}^{MEA} [A + (1 - A) \cdot \exp(-C \cdot w_{sol})]$ , with  $A = 0$ . Note:  $\alpha_x$  is the weight fraction of alcohol in the solvent where  $x$  being the solvent identity.**

| Solvent               | $\alpha_x$ | $C$          |
|-----------------------|------------|--------------|
| MeOH                  | 1.00       | -0.292±0.104 |
| MeOH/H <sub>2</sub> O | 0.70       | -0.696±0.209 |
| MeOH/H <sub>2</sub> O | 0.44       | -1.348±0.113 |
| MeOH/H <sub>2</sub> O | 0.20       | -1.730±0.244 |
| EtOH                  | 1.00       | -0.435±0.173 |
| EtOH/H <sub>2</sub> O | 0.70       | -0.647±0.091 |
| BuOH                  | 1.00       | -0.642±0.130 |

**Table S15. Best-fit values of  $C$ , with 95% confidence intervals, from functional representation of  $k_p^{MA} \left( \frac{\text{L}}{\text{mol} \cdot \text{s}} \right) = k_{p, bulk}^{MA} [A + (1 - A) \cdot \exp(-C \cdot w_{sol})]$ , with  $A = 0$  at different temperatures.**

| Solvent               | $\alpha_{EtOH}$ | $C$ (30 °C)  | $C$ (40 °C)  | $C$ (50 °C)  | $C$ (60 °C)  |
|-----------------------|-----------------|--------------|--------------|--------------|--------------|
| EtOH                  | 1.00            | -0.863±0.084 | -0.714±0.267 | -0.593±0.325 | -0.426±0.332 |
| EtOH/H <sub>2</sub> O | 0.75            | -1.205±0.150 | -1.033       | -0.876       | -0.700       |
| EtOH/H <sub>2</sub> O | 0.70            | –            | -0.947       | -0.830       | –            |
| EtOH/H <sub>2</sub> O | 0.50            | -1.656±0.086 | -1.462       | -1.383       | -1.238       |
| EtOH/H <sub>2</sub> O | 0.25            | -2.378±0.094 | -2.140       | -1.994       | –            |
| H <sub>2</sub> O      | 0.00            | -2.890±0.037 | -2.741±0.007 | -2.568       | –            |

**Table S16. Best-fit values of  $A$  and  $C$ , with 95% confidence intervals, from functional representation of  $k_p^{AA} \left( \frac{\text{L}}{\text{mol}\cdot\text{s}} \right) = k_{p, bulk}^{AA} [A + (1 - A) \cdot \exp(-C \cdot w_{sol})]$ , at 25 °C, with  $C = -2.5$ .**

| Solvent               | $\alpha_x$ | $A$         |
|-----------------------|------------|-------------|
| EtOH                  | 1.00       | 1.077±0.017 |
| EtOH/H <sub>2</sub> O | 0.44       | 0.947±0.017 |
| EtOH/H <sub>2</sub> O | 0.00       | 0.627±0.058 |

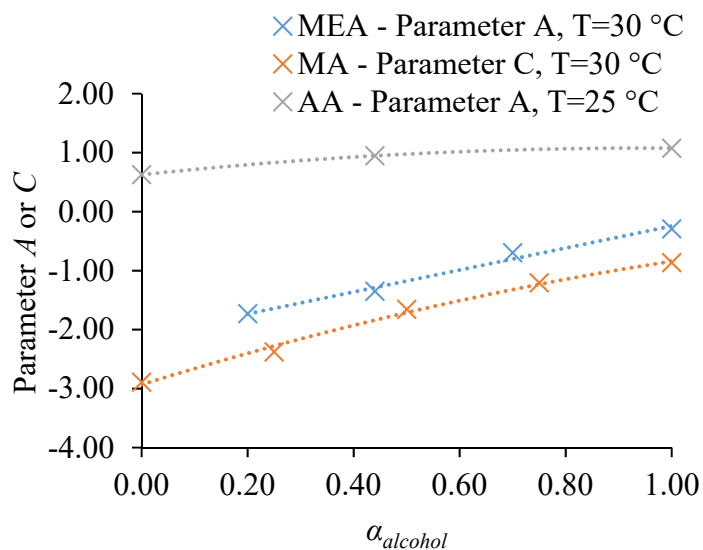

**Figure S10. Parameter  $A$  and  $C$  from fitting of  $k_p$  expression to PLP data as a function of  $\alpha_{alcohol}$  (balance H<sub>2</sub>O) for MA (EtOH), MEA (MeOH) and AA (EtOH). Note:  $A = 0$  for MEA and MA, and  $C = -2.5$  for AA.**

**Table S17.  $k_p$  values for AA determined from PLP experiments conducted in EtOH/H<sub>2</sub>O solutions. Experiments used DMPA as initiator unless otherwise indicated (<sup>a</sup>LiTPO initiator). Experiments were conducted at 25 °C unless otherwise indicated (<sup>b</sup>20 °C).  $N_p$  is the number of pulses performed on the sample,  $w_{AA}$  is weight fraction of monomer in solution and  $\alpha_{EtOH}$  is the weight fraction of EtOH (balance H<sub>2</sub>O) in the solvent. Note: the fit in Figure 8 at  $\alpha_{EtOH} = 0$ , uses a combination of previously published data ( $w_{AA} = 0.20, 0.40$  at 25 °C)<sup>10</sup> and data determined in this current work,  $w_{AA} = 0.05, 0.10$  at 25 °C, and  $w_{AA} = 0.76$  at 20 °C adjusted to 25 °C assuming AA  $E_A$  at  $w_{AA} = 0.40$  (12.2 kJ·mol<sup>-1</sup>).<sup>10</sup>**

| $w_{AA}$ | Solvent | $\alpha_{EtOH}$ | $C_{Initiator}$<br>(mmol·L <sup>-1</sup> ) | $f$<br>(Hz) | $N_p$ | log $M_1$<br>RI | $M_1/M_2$ | RI $k_{p1} \cdot 10^{-3}$<br>(L·mol <sup>-1</sup> ·s <sup>-1</sup> ) | Notes |
|----------|---------|-----------------|--------------------------------------------|-------------|-------|-----------------|-----------|----------------------------------------------------------------------|-------|
| 0.84     | EtOH    | 1.00            | 5.0                                        | 250         | 25    | 5.104           | -         | 29.4                                                                 |       |
|          |         |                 | 5.0                                        | 250         | 25    | 5.099           | -         | 29.0                                                                 |       |
|          |         |                 | 5.0                                        | 250         | 50    | 5.113           | -         | 30.1                                                                 |       |
|          |         |                 | 5.0                                        | 250         | 50    | 5.110           | -         | 29.9                                                                 |       |
|          |         |                 | 5.0                                        | 500         | 50    | 4.810           | 0.53      | 29.9                                                                 |       |
|          |         |                 | 5.0                                        | 500         | 50    | 4.812           | 0.53      | 30.1                                                                 |       |
|          |         |                 | 5.0                                        | 500         | 100   | 4.839           | 0.53      | 32.0                                                                 |       |
| 0.65     | EtOH    | 1.00            | 5.0                                        | 250         | 100   | 4.957           | 0.59      | 28.6                                                                 |       |
|          |         |                 | 5.0                                        | 250         | 100   | 4.960           | 0.60      | 28.8                                                                 |       |
|          |         |                 | 5.0                                        | 250         | 200   | 4.988           | 0.67      | 31.1                                                                 |       |
|          |         |                 | 5.0                                        | 250         | 200   | 4.988           | -         | 31.1                                                                 |       |
|          |         |                 | 5.0                                        | 500         | 200   | 4.685           | 0.52      | 30.9                                                                 |       |
|          |         |                 | 5.0                                        | 500         | 200   | 4.685           | 0.53      | 30.9                                                                 |       |
|          |         |                 | 5.0                                        | 500         | 300   | 4.730           | 0.55      | 34.6                                                                 |       |
|          |         |                 | 5.0                                        | 500         | 300   | 4.722           | 0.54      | 33.9                                                                 |       |
| 0.45     | EtOH    | 1.00            | 5.0                                        | 250         | 100   | 4.681           | 0.54      | 23.1                                                                 |       |
|          |         |                 | 5.0                                        | 250         | 100   | 4.680           | 0.54      | 23.1                                                                 |       |
|          |         |                 | 5.0                                        | 250         | 200   | 4.684           | 0.54      | 23.3                                                                 |       |
|          |         |                 | 5.0                                        | 250         | 200   | 4.689           | 0.55      | 23.6                                                                 |       |
|          |         |                 | 5.0                                        | 500         | 100   | 4.318           | 0.45      | 20.0                                                                 |       |
|          |         |                 | 5.0                                        | 500         | 100   | 4.323           | 0.45      | 20.2                                                                 |       |
|          |         |                 | 5.0                                        | 500         | 200   | 4.344           | 0.46      | 21.4                                                                 |       |
|          |         |                 | 5.0                                        | 500         | 200   | 4.345           | 0.46      | 21.5                                                                 |       |
| 0.20     | EtOH    | 1.00            | 5.0                                        | 250         | 150   | 4.068           | 0.45      | 13.9                                                                 |       |
|          |         |                 | 5.0                                        | 250         | 150   | 4.064           | 0.44      | 13.7                                                                 |       |
|          |         |                 | 5.0                                        | 250         | 300   | 4.065           | 0.45      | 13.9                                                                 |       |
|          |         |                 | 5.0                                        | 250         | 300   | 4.066           | 0.45      | 13.9                                                                 |       |
|          |         |                 | 5.0                                        | 500         | 150   | 3.700           | 0.41      | 11.9                                                                 |       |
|          |         |                 | 5.0                                        | 500         | 150   | 3.703           | 0.41      | 12.0                                                                 |       |
|          |         |                 | 5.0                                        | 500         | 300   | 3.711           | 0.42      | 12.3                                                                 |       |
|          |         |                 | 5.0                                        | 500         | 300   | 3.706           | 0.42      | 12.1                                                                 |       |
| 0.06     | EtOH    | 1.00            | 5.0                                        | 200         | 300   | 3.483           | 0.41      | 9.5                                                                  |       |

|      |                           |      |     |     |     |       |      |      |   |
|------|---------------------------|------|-----|-----|-----|-------|------|------|---|
|      |                           |      | 5.0 | 200 | 300 | 3.482 | 0.42 | 9.5  |   |
|      |                           |      | 5.0 | 200 | 600 | 3.472 | -    | 9.3  |   |
|      |                           |      | 5.0 | 200 | 600 | 3.471 | -    | 9.3  |   |
|      |                           |      | 5.0 | 400 | 300 | 3.308 | -    | 12.6 |   |
|      |                           |      | 5.0 | 400 | 300 | 3.318 | -    | 12.9 |   |
|      |                           |      | 5.0 | 400 | 600 | 3.346 | -    | 13.9 |   |
|      |                           |      | 5.0 | 400 | 600 | 3.347 | -    | 13.9 |   |
| 0.79 | EtOH/<br>H <sub>2</sub> O | 0.44 | 5.0 | 250 | 25  | 5.136 | -    | 34.4 |   |
|      |                           |      | 5.0 | 250 | 25  | 5.137 | -    | 34.4 |   |
|      |                           |      | 5.0 | 250 | 50  | 5.144 | -    | 35.1 |   |
|      |                           |      | 5.0 | 250 | 50  | 5.147 | -    | 35.4 |   |
|      |                           |      | 5.0 | 500 | 50  | 4.849 | 0.52 | 35.5 |   |
|      |                           |      | 5.0 | 500 | 50  | 4.838 | 0.51 | 34.6 |   |
|      |                           |      | 5.0 | 500 | 100 | 4.875 | 0.52 | 37.9 |   |
|      |                           |      | 5.0 | 500 | 100 | 4.890 | 0.53 | 39.3 |   |
| 0.59 | EtOH/<br>H <sub>2</sub> O | 0.44 | 5.0 | 250 | 50  | 5.056 | 0.62 | 39.5 |   |
|      |                           |      | 5.0 | 250 | 50  | 5.057 | 0.63 | 39.6 |   |
|      |                           |      | 5.0 | 250 | 100 | 5.076 | -    | 41.7 |   |
|      |                           |      | 5.0 | 250 | 100 | 5.074 | -    | 41.5 |   |
|      |                           |      | 5.0 | 500 | 50  | 4.749 | 0.51 | 38.9 |   |
|      |                           |      | 5.0 | 500 | 50  | 4.749 | 0.50 | 38.9 |   |
|      |                           |      | 5.0 | 500 | 100 | 4.760 | 0.50 | 40.0 |   |
|      |                           |      | 5.0 | 500 | 100 | 4.763 | 0.51 | 40.3 |   |
| 0.40 | EtOH/<br>H <sub>2</sub> O | 0.44 | 5.0 | 250 | 50  | 4.915 | 0.56 | 44.1 |   |
|      |                           |      | 5.0 | 250 | 50  | 4.913 | 0.56 | 43.9 |   |
|      |                           |      | 5.0 | 250 | 100 | 4.926 | 0.57 | 45.5 |   |
|      |                           |      | 5.0 | 250 | 100 | 4.926 | 0.56 | 45.5 |   |
|      |                           |      | 5.0 | 500 | 50  | 4.600 | 0.50 | 42.6 |   |
|      |                           |      | 5.0 | 500 | 50  | 4.598 | 0.49 | 42.4 |   |
|      |                           |      | 5.0 | 500 | 100 | 4.612 | 0.49 | 44.1 |   |
|      |                           |      | 5.0 | 500 | 100 | 4.613 | 0.50 | 44.2 |   |
| 0.20 | EtOH/<br>H <sub>2</sub> O | 0.44 | 5.0 | 250 | 150 | 4.636 | 0.53 | 47.5 |   |
|      |                           |      | 5.0 | 250 | 150 | 4.644 | 0.54 | 48.4 |   |
|      |                           |      | 5.0 | 250 | 200 | 4.658 | 0.54 | 50.3 |   |
|      |                           |      | 5.0 | 250 | 200 | 4.652 | 0.53 | 49.6 |   |
|      |                           |      | 5.0 | 500 | 150 | 4.298 | 0.45 | 43.7 |   |
|      |                           |      | 5.0 | 500 | 150 | 4.298 | 0.46 | 43.7 |   |
|      |                           |      | 5.0 | 500 | 200 | 4.298 | 0.46 | 43.8 |   |
|      |                           |      | 5.0 | 500 | 200 | 4.299 | 0.45 | 43.9 |   |
| 0.11 | EtOH/<br>H <sub>2</sub> O | 0.44 | 3.0 | 250 | 150 | 4.425 | 0.50 | 54.0 | a |
|      |                           |      | 3.0 | 250 | 150 | 4.425 | 0.51 | 54.0 | a |
|      |                           |      | 3.0 | 250 | 300 | 4.432 | 0.51 | 56.2 | a |
|      |                           |      | 3.0 | 250 | 300 | 4.431 | 0.50 | 56.1 | a |
|      |                           |      | 3.0 | 500 | 150 | 4.081 | 0.44 | 48.8 | a |
|      |                           |      | 3.0 | 500 | 150 | 4.075 | 0.43 | 48.1 | a |

|      |                           |      |       |                           |      |       |      |      |       |
|------|---------------------------|------|-------|---------------------------|------|-------|------|------|-------|
|      |                           |      | 3.0   | 500                       | 300  | 4.078 | 0.43 | 49.4 | a     |
|      |                           |      | 3.0   | 500                       | 300  | 4.079 | 0.44 | 49.5 | a     |
| 0.10 | EtOH/<br>H <sub>2</sub> O | 0.44 | 5.0   | 250                       | 150  | 4.334 | 0.50 | 46.6 |       |
|      |                           |      | 5.0   | 250                       | 150  | 4.340 | 0.49 | 47.3 |       |
|      |                           |      | 5.0   | 250                       | 300  | 4.316 | 0.49 | 45.6 |       |
|      |                           |      | 5.0   | 250                       | 300  | 4.321 | 0.49 | 46.1 |       |
|      |                           |      | 5.0   | 500                       | 150  | 3.971 | 0.44 | 40.2 |       |
|      |                           |      | 5.0   | 500                       | 150  | 3.967 | 0.42 | 39.8 |       |
|      |                           |      | 5.0   | 500                       | 300  | 3.974 | 0.44 | 41.0 |       |
|      |                           |      | 5.0   | 500                       | 300  | 3.970 | 0.44 | 40.6 |       |
|      |                           |      | 0.06  | EtOH/<br>H <sub>2</sub> O | 0.44 | 3.0   | 250  | 150  | 4.126 |
| 3.0  | 250                       | 150  |       |                           |      | 4.106 | 0.47 | 50.8 | a     |
| 3.0  | 250                       | 300  |       |                           |      | 4.083 | 0.47 | 49.2 | a     |
| 3.0  | 250                       | 300  |       |                           |      | 4.082 | 0.47 | 49.1 | a     |
| 3.0  | 500                       | 150  |       |                           |      | 3.762 | 0.46 | 45.9 | a     |
| 3.0  | 500                       | 150  |       |                           |      | 3.751 | 0.45 | 44.7 | a     |
| 3.0  | 500                       | 300  |       |                           |      | 3.734 | 0.45 | 43.8 | a     |
| 3.0  | 500                       | 300  |       |                           |      | 3.732 | 0.44 | 43.6 | a     |
| 0.05 | EtOH/<br>H <sub>2</sub> O | 0.44 | 5.0   | 250                       | 150  | 3.975 | 0.43 | 41.4 |       |
|      |                           |      | 5.0   | 250                       | 150  | 3.980 | 0.44 | 41.9 |       |
|      |                           |      | 5.0   | 250                       | 300  | 3.954 | 0.44 | 39.8 |       |
|      |                           |      | 5.0   | 250                       | 300  | 3.956 | 0.44 | 40.0 |       |
|      |                           |      | 5.0   | 500                       | 150  | 3.623 | 0.42 | 36.9 |       |
|      |                           |      | 5.0   | 500                       | 150  | 3.629 | 0.43 | 37.4 |       |
|      |                           |      | 5.0   | 500                       | 300  | 3.606 | 0.42 | 35.6 |       |
| 0.76 | H <sub>2</sub> O          | 0.00 | 2.0   | 250                       | 25   | 5.216 | 0.62 | 40.0 | b     |
|      |                           |      | 2.0   | 250                       | 25   | 5.213 | 0.64 | 39.7 | b     |
|      |                           |      | 2.0   | 250                       | 50   | 5.218 | 0.61 | 40.2 | b     |
|      |                           |      | 2.0   | 250                       | 50   | 5.218 | 0.62 | 40.2 | b     |
|      |                           |      | 2.0   | 500                       | 25   | 4.899 | 0.43 | 38.6 | b     |
|      |                           |      | 2.0   | 500                       | 25   | 4.909 | 0.46 | 39.5 | b     |
|      |                           |      | 5.0   | 250                       | 25   | 5.217 | 0.62 | 40.2 | b     |
|      |                           |      | 5.0   | 250                       | 25   | 5.215 | 0.62 | 40.0 | b     |
|      |                           |      | 5.0   | 250                       | 25   | 5.219 | 0.62 | 40.4 | b     |
|      |                           |      | 5.0   | 250                       | 25   | 5.217 | 0.62 | 40.2 | b     |
|      |                           |      | 5.0   | 250                       | 50   | 5.244 | 0.65 | 43.0 | b     |
|      |                           |      | 5.0   | 250                       | 50   | 5.243 | 0.65 | 42.9 | b     |
|      |                           |      | 5.0   | 250                       | 50   | 5.217 | 0.63 | 40.2 | b     |
|      |                           |      | 5.0   | 250                       | 50   | 5.219 | 0.63 | 40.3 | b     |
|      |                           |      | 5.0   | 500                       | 25   | 4.884 | 0.46 | 37.4 | b     |
|      |                           |      | 5.0   | 500                       | 25   | 4.891 | 0.46 | 38.0 | b     |
|      |                           |      | 5.0   | 500                       | 25   | 4.887 | 0.46 | 37.6 | b     |
|      |                           |      | 5.0   | 500                       | 25   | 4.890 | 0.46 | 37.9 | b     |
| 5.0  | 500                       | 50   | 4.896 | 0.46                      | 38.4 | b     |      |      |       |

|      |                  |      |     |     |     |       |      |       |   |
|------|------------------|------|-----|-----|-----|-------|------|-------|---|
|      |                  |      | 5.0 | 500 | 50  | 4.896 | 0.47 | 38.4  | b |
|      |                  |      | 5.0 | 500 | 50  | 4.904 | 0.46 | 39.2  | b |
|      |                  |      | 5.0 | 500 | 50  | 4.909 | 0.46 | 39.6  | b |
|      |                  |      | 5.0 | 500 | 100 | 4.940 | 0.46 | 42.9  | b |
|      |                  |      | 5.0 | 500 | 100 | 4.943 | 0.47 | 43.2  | b |
|      |                  |      | 5.0 | 500 | 200 | 5.034 | 0.53 | 53.8  | b |
| 0.10 | H <sub>2</sub> O | 0.00 | 3.0 | 250 | 50  | 4.806 | 0.61 | 125.8 | a |
|      |                  |      | 3.0 | 250 | 50  | 4.807 | 0.60 | 126.1 | a |
|      |                  |      | 3.0 | 250 | 150 | 4.812 | 0.60 | 131.5 | a |
|      |                  |      | 3.0 | 250 | 150 | 4.809 | 0.60 | 130.6 | a |
|      |                  |      | 3.0 | 500 | 50  | 4.484 | 0.53 | 119.7 | a |
|      |                  |      | 3.0 | 500 | 50  | 4.483 | 0.52 | 119.4 | a |
|      |                  |      | 3.0 | 500 | 150 | 4.488 | 0.54 | 123.5 | a |
|      |                  |      | 3.0 | 500 | 150 | 4.491 | 0.55 | 124.4 | a |
| 0.05 | H <sub>2</sub> O | 0.00 | 3.0 | 250 | 50  | 4.610 | 0.59 | 176.3 | a |
|      |                  |      | 3.0 | 250 | 50  | 4.611 | 0.50 | 176.6 | a |
|      |                  |      | 3.0 | 250 | 150 | 4.606 | 0.53 | 179.8 | a |
|      |                  |      | 3.0 | 250 | 150 | 4.597 | 0.52 | 176.2 | a |
|      |                  |      | 3.0 | 500 | 50  | 4.246 | 0.56 | 152.0 | a |
|      |                  |      | 3.0 | 500 | 50  | 4.251 | 0.56 | 153.8 | a |
|      |                  |      | 3.0 | 500 | 150 | 4.251 | 0.57 | 158.1 | a |
|      |                  |      | 3.0 | 500 | 150 | 4.249 | 0.58 | 157.3 | a |

**Table S18.**  $k_p$  values for AA determined from PLP experiments at  $w_{AA} = 0.20$  in DMF. Experiments used DMPA as initiator and were conducted at 25 °C.  $N_p$  is the number of pulses performed on the sample and  $C_{initiator} = 10 \text{ mmol}\cdot\text{L}^{-1}$ .

| $f$<br>(Hz) | $N_p$ | $\log M_1$<br>RI | $M_1/M_2$ | RI $k_{p1}\cdot 10^{-3}$<br>( $\text{L}\cdot\text{mol}^{-1}\cdot\text{s}^{-1}$ ) |
|-------------|-------|------------------|-----------|----------------------------------------------------------------------------------|
| 250         | 300   | 4.096            | 0.42      | 12.5                                                                             |
| 250         | 300   | 4.099            | 0.42      | 12.6                                                                             |
| 250         | 300   | 4.103            | 0.42      | 12.7                                                                             |
| 250         | 600   | 4.104            | 0.47      | 12.8                                                                             |
| 250         | 600   | 4.104            | 0.43      | 12.9                                                                             |
| 250         | 600   | 4.103            | 0.42      | 12.8                                                                             |
| 500         | 300   | 3.733            | 0.41      | 10.9                                                                             |
| 500         | 300   | 3.736            | 0.40      | 10.9                                                                             |
| 500         | 300   | 3.735            | 0.40      | 10.9                                                                             |
| 500         | 600   | 3.745            | 0.41      | 11.2                                                                             |
| 500         | 600   | 3.746            | 0.40      | 11.2                                                                             |
| 500         | 600   | 3.742            | 0.4       | 11.1                                                                             |

## References

---

- (1) C. Barner-Kowollik, S. Beuermann, M. Buback, P. Castignolles, B. Charleux, M. L. Coote, R. A. Hutchinson, T. Junkers, I. Lacík, G. T. Russell, M. Stach and A. M. van Herk, *Polym Chem.*, 2014, **5**, 204–212.
- (2) J. E. S. Schier, PhD Thesis, Queen's University, Kingston, ON Canada, 2017
- (3) N. F. G. Wittenberg, C. Preusser, H. Kattner, M. Stach, I. Lacík, R. A. Hutchinson and M. Buback, *Macromol. React Eng.*, 2016, **10**, 95–107.
- (4) S. Z. Mikhail and W. R. Kimel, *J. Chem. Eng. Data.*, 1961, **6**, 533–537.
- (5) K. Liang and R. A. Hutchinson, *Macromolecules*, 2010, **43**, 6311–6320.
- (6) M. T. Zafarani-Moattar and N. Tohidifar, *J. Chem. Eng. Data.* 2008, **53**, 785–793.
- (7) R. H. Perry and D. W Green, in *Perry's Chemical Engineers' Handbook*; McGraw-Hill, 1997.
- (8) J. E. S. Schier, D. Cohen-Sacal and R. A. Hutchinson, *Polym. Chem.*, 2017, **8**, 1943–1952.
- (9) A. N. Nikitin, I. Lacík, R. A. Hutchinson, M. Buback and G. T. Russell, *Macromolecules* 2019, **52**, 55–71.
- (10) I. Lacík, S. Beuermann and M. Buback, *Macromolecules*, 2001, **34**, 6224–6228.
